# Supplementary material
Source: Research Square preprint supplement (doi:10.21203/rs.3.rs-10033571/v1)
Supplement: Supplementary file 1 [file d9c0eb847b1174e7d5a3c8be.xlsx]

## Sheet: Form Yanıtları 2
1. sütun	2. sütun	3. sütun	4. sütun	3) Sınıfınız	6. sütun	7. sütun	8. sütun	9. sütun	10. sütun	11. sütun	12. sütun	13. sütun	14. sütun	15. sütun	16. sütun	17. sütun	18. sütun	19. sütun	20. sütun	21. sütun	22. sütun	23. sütun	24. sütun	25. sütun	26. sütun	27. sütun

## Sheet: Form Yanıtları 1
Zaman damgası	T.C. İzmir Katip Çelebi Üniversitesi Sosyal Araştırmalar Etik Kurulu BİLGİLENDİRİLMİŞ GÖNÜLLÜ OLUR FORMU Sizi Dr. Öğr. Üyesi Seçil Özçiftçi ve Tıp Fakültesi Dönem 3 Öğrencileri İris Can, Mustafa Tügün, Betül Yüksek, Melih Yüksek, Emre Yörük tarafından gerçekleştirilecek “Tıp Fakültesi Öğrencilerinin Yapay Zeka Kullanımına Yönelik Bir Anket Çalışması: İzmir Kâtip Çelebi Üniversitesi Tıp Fakültesi …	1) Cinsiyetiniz	2) Yaşınız	3) Sınıfınız	[Veri bilimi konusundaki temel kavramları tanımlayabilirim.]	[İstatistik bilimi hakkında temel kavramları tanımlayabilirim.]	[Yapay zekâ sistemlerinin nasıl eğitildiğini açıklayabilirim.]	[Yapay zekânın temel kavramlarını ve terminolojisini tanımlayabilirim.]	[Sağlıkta yapay zekâ uygulamalarının kullanılmasıyla elde edilen verileri doğru analiz edebilirim.]	[Yapay zekâ ile ilgili araçların ve uygulamaların işlevlerini ve özelliklerini ayırt edebilirim.]	[Yapay zekânın çalışma mantığına uygun iş akışı organize edebilirim.]	[Sağlıkta yapay zekâ uygulamalarının geliştirilmesi için verinin; toplama, analiz, değerlendirme ve güvenliğinin önemini ifade edebilirim.]	[Yapay zekâ uygulamalarına dayalı bilgileri mesleki bilgimle birleştirerek kullanabilirim.]	[Sağlık hizmeti sunumunda yapay zekâ teknolojilerini etkin ve verimli biçimde kullanabilirim.]	[Yapay zekâ uygulamalarını amacına uygun kullanabilirim.]	[Bilgi ve iletişim teknolojilerini kullanarak bilgiye erişebilir, değerlendirebilir, kullanabilir, paylaşabilir ve yeni bilgiler oluşturabilirim.]	[Sağlıkta yapay zekâ uygulamalarının hangi soruna nasıl bir çözüm sunduğunu açıklayabilirim.]	[Yapay zekânın eğitim, hizmet ve araştırma amaçlı kullanılmasını değerli bulurum.]	[Sağlık hizmet sunumunda kullanılan yapay zekâ uygulamalarını hastaya açıklayabilirim.]	[Sağlık alanında karşılaşılan probleme uygun yapay zekâ uygulamasını seçebilirim.]	[Yapay zekâ teknolojisinin sınırlılıklarını açıklayabilirim.]	[Yapay zekâ teknolojisinin güçlü ve zayıf yönlerini açıklayabilirim.]	[Yapay zekâ teknolojisinin yaratabileceği fırsat ve tehditleri öngörebilirim.]	[Sağlık verileri hukuki ve etik normlara uygun biçimde kullanabilirim.]	[Yapay zekâ teknolojilerini kullanırken etik ilkelere uygun hareket edebilirim.]	[Sağlıkta yapay zekâ teknolojilerinin kullanımı ile ilgili hukuki düzenlemeleri takip edebilirim.]
2025-09-30 10:15:26	Evet	Kadın	18-19	1. Sınıf	Kararsızım	Kararsızım	Kararsızım	Kararsızım	Kararsızım	Kararsızım	Kararsızım	Kararsızım	Kararsızım	Kararsızım	Kararsızım	Kararsızım	Kararsızım	Kararsızım	Kararsızım	Kararsızım	Kararsızım	Kararsızım	Kararsızım	Kararsızım	Kararsızım	Kararsızım
2025-09-30 10:16:01	Evet	Erkek	18-19	1. Sınıf	Kararsızım	Kararsızım	Kararsızım	Kararsızım	Kararsızım	Kararsızım	Kararsızım	Kararsızım	Kararsızım	Kararsızım	Kararsızım	Kararsızım	Kararsızım	Kararsızım	Kararsızım	Kararsızım	Kararsızım	Kararsızım	Kararsızım	Kararsızım	Kararsızım	Kararsızım
2025-09-30 10:16:49	Evet	Erkek	18-19	1. Sınıf	Kesinlikle katılmıyorum	Kesinlikle katılmıyorum	Kesinlikle katılmıyorum	Kesinlikle katılmıyorum	Kesinlikle katılmıyorum	Kesinlikle katılmıyorum	Kesinlikle katılmıyorum	Kesinlikle katılmıyorum	Kesinlikle katılmıyorum	Kesinlikle katılmıyorum	Kesinlikle katılmıyorum	Kesinlikle katılmıyorum	Kesinlikle katılmıyorum	Kesinlikle katılmıyorum	Kesinlikle katılmıyorum	Kesinlikle katılmıyorum	Kesinlikle katılmıyorum	Kesinlikle katılmıyorum	Kesinlikle katılmıyorum	Kesinlikle katılmıyorum	Kesinlikle katılmıyorum	Kesinlikle katılmıyorum
2025-09-30 10:17:06	Evet	Erkek	18-19	1. Sınıf	Kesinlikle katılıyorum	Kararsızım	Katılıyorum	Kararsızım	Katılıyorum	Kesinlikle katılıyorum	Katılıyorum	Kararsızım	Kararsızım	Katılıyorum	Kesinlikle katılıyorum	Katılıyorum	Katılıyorum	Kesinlikle katılıyorum	Kesinlikle katılıyorum	Kesinlikle katılıyorum	Katılıyorum	Kararsızım	Katılıyorum	Katılıyorum	Kesinlikle katılıyorum	Kesinlikle katılıyorum
2025-09-30 10:17:25	Evet	Kadın	18-19	1. Sınıf	Katılmıyorum	Katılmıyorum	Katılmıyorum	Katılmıyorum	Katılmıyorum	Katılmıyorum	Katılmıyorum	Katılmıyorum	Katılmıyorum	Katılmıyorum	Katılmıyorum	Katılmıyorum	Katılmıyorum	Katılmıyorum	Katılmıyorum	Katılmıyorum	Katılmıyorum	Katılmıyorum	Katılmıyorum	Katılmıyorum	Katılmıyorum	Katılmıyorum
2025-09-30 10:17:34	Evet	Kadın	18-19	1. Sınıf	Kesinlikle katılmıyorum	Kesinlikle katılmıyorum	Kesinlikle katılmıyorum	Kesinlikle katılmıyorum	Kesinlikle katılmıyorum	Kesinlikle katılmıyorum	Kesinlikle katılmıyorum	Kesinlikle katılmıyorum	Kesinlikle katılmıyorum	Kesinlikle katılmıyorum	Kesinlikle katılmıyorum	Kesinlikle katılmıyorum	Kesinlikle katılmıyorum	Kesinlikle katılmıyorum	Kesinlikle katılmıyorum	Kesinlikle katılmıyorum	Kesinlikle katılmıyorum	Kesinlikle katılmıyorum	Kesinlikle katılmıyorum	Kesinlikle katılmıyorum	Kesinlikle katılmıyorum	Kesinlikle katılmıyorum
2025-09-30 10:17:53	Evet	Erkek	18-19	1. Sınıf	Katılıyorum	Katılıyorum	Katılıyorum	Katılıyorum	Katılıyorum	Katılıyorum	Katılıyorum	Katılıyorum	Katılıyorum	Katılıyorum	Katılıyorum	Katılıyorum	Katılıyorum	Katılıyorum	Katılıyorum	Katılıyorum	Katılıyorum	Katılıyorum	Katılıyorum	Katılıyorum	Katılıyorum	Katılıyorum
2025-09-30 10:18:18	Evet	Kadın	18-19	1. Sınıf	Kesinlikle katılıyorum	Kesinlikle katılıyorum	Kesinlikle katılıyorum	Kesinlikle katılıyorum	Kesinlikle katılıyorum	Kesinlikle katılıyorum	Kesinlikle katılıyorum	Kararsızım	Kesinlikle katılıyorum	Katılıyorum	Katılıyorum	Katılıyorum	Katılmıyorum	Katılmıyorum	Kararsızım	Katılıyorum	Katılıyorum	Kesinlikle katılıyorum	Kesinlikle katılıyorum	Kesinlikle katılıyorum	Kesinlikle katılıyorum	Katılıyorum
2025-09-30 10:18:25	Evet	Erkek	18-19	1. Sınıf	Kararsızım	Kararsızım	Katılıyorum	Katılıyorum	Kararsızım	Katılıyorum	Kesinlikle katılıyorum	Kesinlikle katılıyorum	Kesinlikle katılıyorum	Kesinlikle katılıyorum	Kesinlikle katılıyorum	Kesinlikle katılıyorum	Katılıyorum	Kesinlikle katılıyorum	Katılıyorum	Kesinlikle katılıyorum	Kesinlikle katılıyorum	Kesinlikle katılıyorum	Katılıyorum	Katılıyorum	Katılıyorum	Katılıyorum
2025-09-30 10:18:35	Evet	Kadın	18-19	1. Sınıf	Kararsızım	Katılmıyorum	Katılmıyorum	Katılmıyorum	Katılmıyorum	Katılmıyorum	Katılmıyorum	Kararsızım	Katılıyorum	Katılıyorum	Katılıyorum	Katılıyorum	Kararsızım	Kararsızım	Kararsızım	Kararsızım	Kararsızım	Kararsızım	Kararsızım	Kararsızım	Kararsızım	Kararsızım
2025-09-30 10:18:35	Evet	Kadın	18-19	1. Sınıf	Katılmıyorum	Katılmıyorum	Katılmıyorum	Katılmıyorum	Katılıyorum	Kararsızım	Katılmıyorum	Katılıyorum	Katılıyorum	Katılıyorum	Katılıyorum	Katılıyorum	Katılıyorum	Kararsızım	Katılıyorum	Katılıyorum	Katılmıyorum	Kararsızım	Katılıyorum	Katılıyorum	Katılıyorum	Katılıyorum
2025-09-30 10:19:13	Evet	Erkek	18-19	1. Sınıf	Kararsızım	Kararsızım	Kararsızım	Kararsızım	Katılıyorum	Katılıyorum	Katılıyorum	Kesinlikle katılıyorum	Kararsızım	Katılıyorum	Kararsızım	Katılıyorum	Katılıyorum	Katılıyorum	Katılıyorum	Kararsızım	Kararsızım	Katılıyorum	Katılıyorum	Katılıyorum	Katılıyorum	Katılıyorum
2025-09-30 10:19:32	Evet	Erkek	18-19	1. Sınıf	Kararsızım	Kararsızım	Kararsızım	Katılıyorum	Katılıyorum	Katılıyorum	Katılıyorum	Katılıyorum	Kararsızım	Katılıyorum	Katılıyorum	Katılıyorum	Katılıyorum	Katılıyorum	Katılıyorum	Katılıyorum	Katılıyorum	Katılıyorum	Katılıyorum	Katılıyorum	Katılıyorum	Katılıyorum
2025-09-30 10:19:35	Evet	Kadın	18-19	1. Sınıf	Katılıyorum	Katılıyorum	Katılıyorum	Katılıyorum	Katılıyorum	Katılıyorum	Katılıyorum	Katılıyorum	Katılıyorum	Katılıyorum	Katılıyorum	Katılıyorum	Katılıyorum	Katılıyorum	Katılıyorum	Kararsızım	Kararsızım	Kararsızım	Katılıyorum	Kararsızım	Kararsızım	Katılıyorum
2025-09-30 10:19:36	Evet	Erkek	18-19	1. Sınıf	Kararsızım	Katılıyorum	Katılmıyorum	Katılıyorum	Kesinlikle katılıyorum	Kesinlikle katılıyorum	Kesinlikle katılıyorum	Kesinlikle katılıyorum	Kesinlikle katılıyorum	Kesinlikle katılıyorum	Kesinlikle katılıyorum	Kesinlikle katılıyorum	Katılıyorum	Katılıyorum	Kesinlikle katılıyorum	Kesinlikle katılıyorum	Kesinlikle katılıyorum	Kesinlikle katılıyorum	Katılıyorum	Kesinlikle katılıyorum	Kesinlikle katılıyorum	Katılıyorum
2025-09-30 10:19:38	Evet	Erkek	18-19	1. Sınıf	Katılmıyorum	Katılıyorum	Katılıyorum	Kararsızım	Katılıyorum	Katılıyorum	Katılıyorum	Katılıyorum	Katılıyorum	Katılıyorum	Katılmıyorum	Kesinlikle katılıyorum	Katılıyorum	Kesinlikle katılıyorum	Katılıyorum	Kararsızım	Katılmıyorum	Katılıyorum	Katılıyorum	Katılmıyorum	Katılmıyorum	Katılmıyorum
2025-09-30 10:19:45	Evet	Kadın	18-19	1. Sınıf	Katılmıyorum	Katılmıyorum	Katılıyorum	Katılıyorum	Katılmıyorum	Katılıyorum	Katılıyorum	Katılıyorum	Katılıyorum	Katılıyorum	Katılıyorum	Kesinlikle katılıyorum	Kararsızım	Katılıyorum	Katılıyorum	Katılıyorum	Katılmıyorum	Katılmıyorum	Kesinlikle katılmıyorum	Kararsızım	Katılıyorum	Kararsızım
2025-09-30 10:19:58	Evet	Kadın	18-19	1. Sınıf	Katılıyorum	Katılıyorum	Katılıyorum	Katılıyorum	Katılıyorum	Kararsızım	Kararsızım	Katılıyorum	Katılmıyorum	Katılmıyorum	Katılıyorum	Katılıyorum	Katılıyorum	Katılmıyorum	Katılıyorum	Katılıyorum	Katılıyorum	Katılıyorum	Katılıyorum	Katılmıyorum	Katılıyorum	Katılıyorum
2025-09-30 10:20:05	Evet	Kadın	18-19	1. Sınıf	Katılmıyorum	Katılmıyorum	Katılmıyorum	Katılmıyorum	Kararsızım	Kararsızım	Katılıyorum	Kararsızım	Katılıyorum	Katılıyorum	Katılıyorum	Katılıyorum	Kararsızım	Katılıyorum	Katılıyorum	Katılıyorum	Katılıyorum	Katılıyorum	Katılıyorum	Katılıyorum	Katılıyorum	Kararsızım
2025-09-30 10:20:25	Evet	Kadın	18-19	1. Sınıf	Katılıyorum	Katılmıyorum	Kararsızım	Kararsızım	Katılıyorum	Katılıyorum	Katılıyorum	Katılıyorum	Katılıyorum	Katılıyorum	Katılıyorum	Katılıyorum	Kesinlikle katılıyorum	Kesinlikle katılıyorum	Katılıyorum	Kararsızım	Katılıyorum	Katılıyorum	Kesinlikle katılıyorum	Katılıyorum	Katılıyorum	Katılıyorum
2025-09-30 10:21:05	Evet	Kadın	18-19	1. Sınıf	Katılmıyorum	Katılmıyorum	Katılmıyorum	Katılmıyorum	Katılmıyorum	Katılmıyorum	Kesinlikle katılmıyorum	Kesinlikle katılmıyorum	Katılmıyorum	Kesinlikle katılmıyorum	Kesinlikle katılmıyorum	Kesinlikle katılmıyorum	Katılmıyorum	Kesinlikle katılmıyorum	Kesinlikle katılmıyorum	Katılmıyorum	Katılmıyorum	Katılmıyorum	Katılmıyorum	Kesinlikle katılmıyorum	Kesinlikle katılmıyorum	Kesinlikle katılmıyorum
2025-09-30 10:21:20	Evet	Kadın	18-19	1. Sınıf	Kesinlikle katılmıyorum	Kesinlikle katılmıyorum	Katılmıyorum	Kesinlikle katılmıyorum	Kesinlikle katılmıyorum	Kesinlikle katılmıyorum	Kesinlikle katılmıyorum	Kesinlikle katılmıyorum	Katılmıyorum	Kesinlikle katılmıyorum	Katılmıyorum	Katılmıyorum	Katılmıyorum	Kesinlikle katılıyorum	Katılmıyorum	Katılmıyorum	Katılmıyorum	Kararsızım	Kararsızım	Kararsızım	Katılıyorum	Katılıyorum
2025-09-30 10:21:22	Evet	Kadın	18-19	1. Sınıf	Katılıyorum	Katılıyorum	Katılıyorum	Katılıyorum	Katılıyorum	Katılıyorum	Katılıyorum	Katılıyorum	Katılıyorum	Katılıyorum	Katılıyorum	Katılıyorum	Katılıyorum	Katılıyorum	Katılıyorum	Katılıyorum	Katılıyorum	Katılıyorum	Katılıyorum	Katılıyorum	Katılıyorum	Katılıyorum
2025-09-30 10:21:34	Evet	Kadın	18-19	1. Sınıf	Katılıyorum	Kararsızım	Katılmıyorum	Katılmıyorum	Katılmıyorum	Katılıyorum	Katılıyorum	Katılıyorum	Katılıyorum	Katılıyorum	Katılıyorum	Katılıyorum	Katılıyorum	Katılıyorum	Kararsızım	Kararsızım	Kararsızım	Katılıyorum	Katılıyorum	Katılıyorum	Katılıyorum	Katılıyorum
2025-09-30 10:21:53	Evet	Erkek	18-19	1. Sınıf	Kararsızım	Kararsızım	Katılıyorum	Kararsızım	Katılıyorum	Katılıyorum	Katılıyorum	Katılıyorum	Kesinlikle katılıyorum	Katılıyorum	Katılıyorum	Kesinlikle katılıyorum	Kesinlikle katılıyorum	Katılıyorum	Katılıyorum	Katılıyorum	Kesinlikle katılıyorum	Kesinlikle katılıyorum	Kesinlikle katılıyorum	Kesinlikle katılıyorum	Katılıyorum	Kesinlikle katılıyorum
2025-09-30 10:21:57	Evet	Kadın	18-19	1. Sınıf	Katılmıyorum	Katılmıyorum	Katılmıyorum	Katılmıyorum	Katılmıyorum	Katılmıyorum	Katılmıyorum	Katılmıyorum	Katılmıyorum	Katılmıyorum	Katılmıyorum	Katılmıyorum	Katılmıyorum	Katılmıyorum	Katılmıyorum	Katılmıyorum	Katılmıyorum	Katılmıyorum	Katılmıyorum	Katılmıyorum	Katılmıyorum	Katılmıyorum
2025-09-30 10:22:01	Evet	Erkek	18-19	1. Sınıf	Katılıyorum	Kesinlikle katılıyorum	Kararsızım	Katılıyorum	Kararsızım	Katılıyorum	Katılıyorum	Katılıyorum	Katılıyorum	Katılıyorum	Katılıyorum	Katılıyorum	Katılıyorum	Katılıyorum	Katılıyorum	Katılıyorum	Katılıyorum	Katılıyorum	Katılıyorum	Katılıyorum	Katılıyorum	Katılıyorum
2025-09-30 10:22:11	Evet	Kadın	18-19	1. Sınıf	Katılmıyorum	Katılmıyorum	Katılmıyorum	Katılmıyorum	Katılmıyorum	Katılmıyorum	Katılmıyorum	Katılıyorum	Katılıyorum	Katılıyorum	Katılıyorum	Kesinlikle katılıyorum	Katılıyorum	Katılıyorum	Katılıyorum	Kararsızım	Kararsızım	Kararsızım	Katılıyorum	Katılıyorum	Katılıyorum	Kararsızım
2025-09-30 10:22:35	Evet	Kadın	18-19	1. Sınıf	Kararsızım	Katılmıyorum	Kararsızım	Kararsızım	Katılıyorum	Katılıyorum	Katılıyorum	Kesinlikle katılıyorum	Katılıyorum	Kararsızım	Kesinlikle katılıyorum	Katılıyorum	Katılıyorum	Kesinlikle katılıyorum	Kesinlikle katılıyorum	Katılıyorum	Katılıyorum	Kesinlikle katılıyorum	Kesinlikle katılıyorum	Kararsızım	Katılıyorum	Katılmıyorum
2025-09-30 10:22:41	Evet	Erkek	18-19	1. Sınıf	Katılıyorum	Katılıyorum	Kararsızım	Kararsızım	Katılıyorum	Katılıyorum	Katılıyorum	Katılıyorum	Katılıyorum	Katılıyorum	Katılıyorum	Katılıyorum	Katılıyorum	Kararsızım	Kararsızım	Katılıyorum	Katılıyorum	Katılıyorum	Katılıyorum	Katılıyorum	Katılıyorum	Katılıyorum
2025-09-30 10:22:56	Evet	Erkek	18-19	1. Sınıf	Kararsızım	Katılmıyorum	Katılmıyorum	Katılıyorum	Kararsızım	Katılmıyorum	Katılmıyorum	Katılmıyorum	Katılıyorum	Kararsızım	Katılıyorum	Katılıyorum	Katılıyorum	Kesinlikle katılıyorum	Katılıyorum	Kararsızım	Katılmıyorum	Kararsızım	Katılmıyorum	Katılıyorum	Katılıyorum	Katılmıyorum
2025-09-30 10:23:02	Evet	Kadın	18-19	1. Sınıf	Kararsızım	Kararsızım	Katılmıyorum	Katılmıyorum	Kararsızım	Katılıyorum	Kararsızım	Kararsızım	Katılıyorum	Katılmıyorum	Kararsızım	Katılıyorum	Kararsızım	Kararsızım	Katılıyorum	Kararsızım	Katılmıyorum	Kararsızım	Katılıyorum	Katılıyorum	Kararsızım	Katılıyorum
2025-09-30 10:23:12	Evet	Kadın	18-19	1. Sınıf	Katılıyorum	Katılıyorum	Katılıyorum	Katılıyorum	Katılıyorum	Katılıyorum	Katılıyorum	Kesinlikle katılıyorum	Kesinlikle katılıyorum	Kesinlikle katılıyorum	Kesinlikle katılıyorum	Katılıyorum	Kararsızım	Kararsızım	Katılıyorum	Katılıyorum	Katılıyorum	Katılıyorum	Katılıyorum	Katılıyorum	Kesinlikle katılıyorum	Kararsızım
2025-09-30 10:23:35	Evet	Erkek	20-21	1. Sınıf	Katılıyorum	Katılıyorum	Katılıyorum	Katılıyorum	Kararsızım	Katılıyorum	Kararsızım	Kesinlikle katılıyorum	Kararsızım	Kararsızım	Kararsızım	Katılıyorum	Kararsızım	Kesinlikle katılıyorum	Kararsızım	Kararsızım	Katılıyorum	Katılıyorum	Katılıyorum	Kararsızım	Katılıyorum	Katılıyorum
2025-09-30 10:23:39	Evet	Erkek	18-19	1. Sınıf	Kararsızım	Katılıyorum	Katılıyorum	Katılıyorum	Kararsızım	Katılıyorum	Katılıyorum	Kararsızım	Katılmıyorum	Katılıyorum	Katılıyorum	Katılıyorum	Kararsızım	Kesinlikle katılıyorum	Katılmıyorum	Katılmıyorum	Kesinlikle katılıyorum	Kesinlikle katılıyorum	Kesinlikle katılıyorum	Katılıyorum	Kesinlikle katılıyorum	Kesinlikle katılıyorum
2025-09-30 10:23:43	Evet	Erkek	18-19	1. Sınıf	Kararsızım	Kararsızım	Katılmıyorum	Katılmıyorum	Katılıyorum	Katılmıyorum	Katılmıyorum	Katılıyorum	Kararsızım	Katılıyorum	Katılıyorum	Katılıyorum	Katılıyorum	Katılıyorum	Katılmıyorum	Kararsızım	Katılıyorum	Katılıyorum	Katılıyorum	Katılıyorum	Katılıyorum	Katılmıyorum
2025-09-30 10:24:36	Evet	Kadın	18-19	1. Sınıf	Katılmıyorum	Katılmıyorum	Katılmıyorum	Katılmıyorum	Katılıyorum	Katılmıyorum	Katılıyorum	Katılıyorum	Katılıyorum	Katılıyorum	Katılıyorum	Katılıyorum	Katılmıyorum	Katılıyorum	Katılmıyorum	Katılmıyorum	Katılmıyorum	Katılmıyorum	Katılmıyorum	Katılıyorum	Katılıyorum	Kesinlikle katılmıyorum
2025-09-30 10:36:49	Evet	Kadın	18-19	1. Sınıf	Kesinlikle katılmıyorum	Kesinlikle katılmıyorum	Kararsızım	Katılmıyorum	Kesinlikle katılmıyorum	Kararsızım	Kararsızım	Kararsızım	Kararsızım	Katılıyorum	Kesinlikle katılıyorum	Kesinlikle katılıyorum	Katılıyorum	Kesinlikle katılıyorum	Kararsızım	Kararsızım	Kararsızım	Kararsızım	Katılıyorum	Kesinlikle katılıyorum	Kesinlikle katılıyorum	Katılmıyorum
2025-09-30 10:41:21	Evet	Erkek	20-21	3. Sınıf	Katılıyorum	Katılıyorum	Kararsızım	Kararsızım	Katılıyorum	Katılıyorum	Kararsızım	Katılıyorum	Kararsızım	Katılıyorum	Katılıyorum	Kararsızım	Katılıyorum	Katılıyorum	Katılıyorum	Katılıyorum	Katılıyorum	Katılıyorum	Katılıyorum	Katılıyorum	Katılıyorum	Katılıyorum
2025-09-30 10:44:10	Evet	Erkek	20-21	3. Sınıf	Kararsızım	Katılıyorum	Katılıyorum	Katılıyorum	Katılıyorum	Katılıyorum	Katılıyorum	Kararsızım	Kesinlikle katılıyorum	Katılıyorum	Katılıyorum	Katılıyorum	Kararsızım	Kesinlikle katılıyorum	Katılıyorum	Katılıyorum	Kararsızım	Katılıyorum	Kesinlikle katılıyorum	Kararsızım	Kararsızım	Katılıyorum
2025-09-30 10:45:26	Evet	Kadın	22-23	3. Sınıf	Kesinlikle katılıyorum	Katılmıyorum	Katılıyorum	Kesinlikle katılıyorum	Kesinlikle katılıyorum	Katılıyorum	Katılıyorum	Katılıyorum	Katılıyorum	Kararsızım	Katılıyorum	Katılıyorum	Kesinlikle katılıyorum	Kesinlikle katılıyorum	Kesinlikle katılıyorum	Kararsızım	Katılıyorum	Katılıyorum	Katılıyorum	Katılmıyorum	Katılmıyorum	Kesinlikle katılmıyorum
2025-09-30 10:48:01	Evet	Kadın	20-21	3. Sınıf	Katılıyorum	Kararsızım	Kararsızım	Katılmıyorum	Katılıyorum	Katılıyorum	Katılıyorum	Kesinlikle katılıyorum	Kesinlikle katılıyorum	Kesinlikle katılıyorum	Kesinlikle katılıyorum	Kesinlikle katılıyorum	Katılıyorum	Kesinlikle katılıyorum	Kararsızım	Katılıyorum	Katılıyorum	Katılıyorum	Kesinlikle katılıyorum	Kesinlikle katılıyorum	Katılıyorum	Katılmıyorum
2025-09-30 11:55:08	Evet	Erkek	20-21	3. Sınıf	Katılmıyorum	Katılmıyorum	Katılmıyorum	Katılmıyorum	Katılmıyorum	Katılmıyorum	Katılmıyorum	Katılıyorum	Katılmıyorum	Katılmıyorum	Katılıyorum	Kararsızım	Katılıyorum	Katılıyorum	Katılmıyorum	Katılmıyorum	Katılmıyorum	Kararsızım	Katılıyorum	Katılıyorum	Katılıyorum	Katılmıyorum
2025-09-30 11:55:08	Evet	Erkek	20-21	3. Sınıf	Katılmıyorum	Katılıyorum	Katılmıyorum	Katılmıyorum	Katılıyorum	Katılıyorum	Katılıyorum	Katılıyorum	Katılıyorum	Katılıyorum	Katılıyorum	Katılıyorum	Katılıyorum	Katılıyorum	Katılmıyorum	Katılmıyorum	Katılmıyorum	Katılıyorum	Katılıyorum	Katılıyorum	Katılıyorum	Katılmıyorum
2025-09-30 11:56:18	Evet	Erkek	20-21	3. Sınıf	Kararsızım	Kararsızım	Kararsızım	Katılmıyorum	Kararsızım	Katılmıyorum	Kararsızım	Katılıyorum	Katılıyorum	Katılıyorum	Katılıyorum	Katılıyorum	Kararsızım	Katılıyorum	Katılmıyorum	Kararsızım	Kararsızım	Kararsızım	Kararsızım	Kararsızım	Katılıyorum	Katılıyorum
2025-09-30 11:58:16	Evet	Kadın	18-19	2. Sınıf	Kesinlikle katılmıyorum	Kesinlikle katılmıyorum	Kesinlikle katılmıyorum	Kesinlikle katılmıyorum	Kesinlikle katılmıyorum	Kesinlikle katılmıyorum	Kesinlikle katılmıyorum	Katılıyorum	Kesinlikle katılmıyorum	Kesinlikle katılmıyorum	Kararsızım	Kesinlikle katılıyorum	Kesinlikle katılmıyorum	Kesinlikle katılıyorum	Kesinlikle katılmıyorum	Kesinlikle katılmıyorum	Kesinlikle katılmıyorum	Kesinlikle katılıyorum	Kararsızım	Kararsızım	Kararsızım	Kesinlikle katılmıyorum
2025-09-30 12:16:22	Evet	Erkek	20-21	3. Sınıf	Kararsızım	Kararsızım	Katılıyorum	Kararsızım	Kararsızım	Katılıyorum	Katılıyorum	Katılıyorum	Katılıyorum	Kararsızım	Katılıyorum	Katılıyorum	Kararsızım	Kesinlikle katılıyorum	Katılıyorum	Kararsızım	Kararsızım	Katılıyorum	Kararsızım	Kararsızım	Kararsızım	Katılmıyorum
2025-09-30 12:19:45	Evet	Kadın	20-21	3. Sınıf	Katılıyorum	Kararsızım	Katılıyorum	Katılıyorum	Katılıyorum	Katılıyorum	Katılıyorum	Katılıyorum	Kesinlikle katılıyorum	Kesinlikle katılıyorum	Kesinlikle katılıyorum	Katılıyorum	Kesinlikle katılıyorum	Kesinlikle katılıyorum	Katılıyorum	Kararsızım	Kesinlikle katılıyorum	Kesinlikle katılıyorum	Kesinlikle katılıyorum	Katılıyorum	Kesinlikle katılıyorum	Katılıyorum
2025-09-30 12:21:38	Evet	Kadın	20-21	3. Sınıf	Katılıyorum	Katılıyorum	Katılıyorum	Katılıyorum	Katılmıyorum	Katılmıyorum	Katılıyorum	Katılıyorum	Kararsızım	Kararsızım	Katılmıyorum	Katılmıyorum	Katılıyorum	Katılıyorum	Katılıyorum	Kesinlikle katılıyorum	Kesinlikle katılıyorum	Katılıyorum	Katılıyorum	Kesinlikle katılıyorum	Kesinlikle katılıyorum	Katılıyorum
2025-09-30 13:01:38	Evet	Erkek	18-19	2. Sınıf	Kesinlikle katılıyorum	Kesinlikle katılıyorum	Kesinlikle katılıyorum	Kesinlikle katılıyorum	Kesinlikle katılıyorum	Kesinlikle katılıyorum	Kesinlikle katılıyorum	Kesinlikle katılıyorum	Kesinlikle katılıyorum	Kesinlikle katılıyorum	Katılıyorum	Kesinlikle katılıyorum	Kesinlikle katılıyorum	Kesinlikle katılıyorum	Kesinlikle katılıyorum	Kesinlikle katılıyorum	Kesinlikle katılıyorum	Kesinlikle katılıyorum	Kesinlikle katılıyorum	Kararsızım	Katılmıyorum	Kesinlikle katılıyorum
2025-09-30 13:11:24	Evet	Kadın	20-21	3. Sınıf	Katılmıyorum	Katılmıyorum	Katılmıyorum	Katılmıyorum	Katılmıyorum	Katılmıyorum	Katılıyorum	Katılıyorum	Katılıyorum	Katılıyorum	Katılıyorum	Katılıyorum	Katılıyorum	Kesinlikle katılıyorum	Katılıyorum	Kararsızım	Kararsızım	Kararsızım	Katılıyorum	Katılıyorum	Katılıyorum	Katılmıyorum
2025-09-30 13:39:54	Evet	Kadın	22-23	3. Sınıf	Katılmıyorum	Kararsızım	Kararsızım	Katılmıyorum	Kararsızım	Katılmıyorum	Kararsızım	Katılmıyorum	Kararsızım	Kesinlikle katılmıyorum	Katılmıyorum	Kararsızım	Kararsızım	Kesinlikle katılmıyorum	Kararsızım	Katılmıyorum	Katılmıyorum	Katılmıyorum	Kesinlikle katılmıyorum	Kararsızım	Kesinlikle katılıyorum	Kesinlikle katılıyorum
2025-09-30 14:43:47	Evet	Kadın	22-23	3. Sınıf	Katılmıyorum	Katılıyorum	Katılmıyorum	Katılıyorum	Katılıyorum	Katılıyorum	Katılıyorum	Kararsızım	Kesinlikle katılıyorum	Kesinlikle katılıyorum	Kesinlikle katılıyorum	Kesinlikle katılıyorum	Kararsızım	Kesinlikle katılıyorum	Kesinlikle katılıyorum	Kesinlikle katılıyorum	Kararsızım	Katılıyorum	Katılıyorum	Kesinlikle katılıyorum	Kesinlikle katılıyorum	Katılmıyorum
2025-09-30 16:40:10	Evet	Erkek	20-21	3. Sınıf	Katılıyorum	Kararsızım	Katılmıyorum	Kararsızım	Katılıyorum	Kararsızım	Kararsızım	Kararsızım	Kararsızım	Kararsızım	Kararsızım	Kararsızım	Kararsızım	Katılıyorum	Katılıyorum	Katılmıyorum	Katılmıyorum	Katılmıyorum	Kararsızım	Kesinlikle katılmıyorum	Katılıyorum	Katılmıyorum
2025-09-30 19:36:12	Evet	Kadın	20-21	3. Sınıf	Katılmıyorum	Katılmıyorum	Katılmıyorum	Katılmıyorum	Katılmıyorum	Kararsızım	Kararsızım	Katılıyorum	Kararsızım	Katılıyorum	Kararsızım	Kararsızım	Katılıyorum	Katılmıyorum	Kararsızım	Katılmıyorum	Kararsızım	Katılmıyorum	Kesinlikle katılmıyorum	Katılmıyorum	Katılmıyorum	Kesinlikle katılmıyorum
2025-10-01 00:27:57	Evet	Kadın	18-19	3. Sınıf	Kesinlikle katılmıyorum	Kesinlikle katılmıyorum	Katılıyorum	Kararsızım	Kesinlikle katılmıyorum	Kesinlikle katılmıyorum	Kesinlikle katılmıyorum	Kesinlikle katılmıyorum	Kararsızım	Katılmıyorum	Katılmıyorum	Katılıyorum	Katılmıyorum	Katılmıyorum	Katılmıyorum	Katılmıyorum	Katılmıyorum	Katılmıyorum	Katılmıyorum	Kararsızım	Katılıyorum	Katılmıyorum
2025-10-01 19:38:36	Evet	Kadın	18-19	1. Sınıf	Katılmıyorum	Katılmıyorum	Katılmıyorum	Katılmıyorum	Katılmıyorum	Katılmıyorum	Katılmıyorum	Katılmıyorum	Katılmıyorum	Katılmıyorum	Katılmıyorum	Katılmıyorum	Katılmıyorum	Katılmıyorum	Katılmıyorum	Katılmıyorum	Katılmıyorum	Katılmıyorum	Katılmıyorum	Katılmıyorum	Katılmıyorum	Katılmıyorum
2025-10-01 19:42:11	Evet	Erkek	18-19	1. Sınıf	Kesinlikle katılıyorum	Kesinlikle katılıyorum	Kesinlikle katılıyorum	Kesinlikle katılıyorum	Kesinlikle katılıyorum	Kesinlikle katılıyorum	Kesinlikle katılıyorum	Kesinlikle katılıyorum	Kesinlikle katılıyorum	Kesinlikle katılıyorum	Kesinlikle katılıyorum	Kesinlikle katılıyorum	Kesinlikle katılıyorum	Kesinlikle katılıyorum	Kesinlikle katılıyorum	Kesinlikle katılıyorum	Kesinlikle katılıyorum	Kesinlikle katılıyorum	Kesinlikle katılıyorum	Kesinlikle katılıyorum	Kesinlikle katılıyorum	Kesinlikle katılıyorum
2025-10-01 19:46:34	Evet	Kadın	20-21	2. Sınıf	Kararsızım	Kararsızım	Katılmıyorum	Katılıyorum	Kararsızım	Katılıyorum	Katılmıyorum	Katılmıyorum	Katılıyorum	Kesinlikle katılıyorum	Kesinlikle katılıyorum	Kesinlikle katılıyorum	Katılıyorum	Kesinlikle katılıyorum	Kesinlikle katılıyorum	Kesinlikle katılıyorum	Katılıyorum	Katılıyorum	Kararsızım	Kesinlikle katılıyorum	Kesinlikle katılıyorum	Katılıyorum
2025-10-01 19:59:33	Evet	Kadın	18-19	1. Sınıf	Kararsızım	Kararsızım	Kararsızım	Katılıyorum	Katılıyorum	Katılıyorum	Katılıyorum	Katılıyorum	Katılıyorum	Katılıyorum	Katılıyorum	Katılıyorum	Katılıyorum	Kesinlikle katılıyorum	Katılıyorum	Katılıyorum	Katılıyorum	Katılıyorum	Kesinlikle katılıyorum	Kesinlikle katılıyorum	Kesinlikle katılıyorum	Kesinlikle katılıyorum
2025-10-01 21:02:03	Evet	Kadın	18-19	2. Sınıf	Kararsızım	Kararsızım	Kararsızım	Kararsızım	Kararsızım	Katılıyorum	Katılıyorum	Katılıyorum	Katılıyorum	Katılıyorum	Katılıyorum	Katılıyorum	Katılıyorum	Katılıyorum	Katılıyorum	Katılıyorum	Katılıyorum	Katılıyorum	Katılıyorum	Katılıyorum	Katılıyorum	Katılıyorum
2025-10-01 22:32:14	Evet	Kadın	18-19	1. Sınıf	Kararsızım	Katılmıyorum	Katılmıyorum	Katılmıyorum	Kararsızım	Katılıyorum	Katılıyorum	Kararsızım	Katılıyorum	Katılıyorum	Kesinlikle katılıyorum	Katılıyorum	Katılmıyorum	Katılıyorum	Kesinlikle katılmıyorum	Kararsızım	Kesinlikle katılmıyorum	Katılmıyorum	Kararsızım	Katılıyorum	Katılıyorum	Katılmıyorum
2025-10-01 23:58:14	Evet	Erkek	20-21	2. Sınıf	Katılıyorum	Katılıyorum	Kararsızım	Katılıyorum	Kararsızım	Katılıyorum	Katılıyorum	Katılıyorum	Katılmıyorum	Kararsızım	Katılıyorum	Katılmıyorum	Kararsızım	Kesinlikle katılıyorum	Kesinlikle katılıyorum	Katılmıyorum	Katılmıyorum	Kesinlikle katılmıyorum	Kesinlikle katılmıyorum	Katılıyorum	Kesinlikle katılıyorum	Katılıyorum
2025-10-02 14:56:17	Evet	Erkek	22-23	5. Sınıf	Katılmıyorum	Katılmıyorum	Katılmıyorum	Katılmıyorum	Katılmıyorum	Katılmıyorum	Katılmıyorum	Kesinlikle katılmıyorum	Katılmıyorum	Katılmıyorum	Katılmıyorum	Katılmıyorum	Katılmıyorum	Katılmıyorum	Katılmıyorum	Katılmıyorum	Katılmıyorum	Katılmıyorum	Katılmıyorum	Katılmıyorum	Kesinlikle katılmıyorum	Kesinlikle katılmıyorum
2025-10-02 15:16:15	Evet	Erkek	22-23	5. Sınıf	Katılmıyorum	Kesinlikle katılmıyorum	Katılmıyorum	Kesinlikle katılmıyorum	Kesinlikle katılmıyorum	Katılmıyorum	Kesinlikle katılmıyorum	Katılmıyorum	Kesinlikle katılmıyorum	Katılmıyorum	Kesinlikle katılmıyorum	Katılmıyorum	Kesinlikle katılmıyorum	Katılmıyorum	Kesinlikle katılmıyorum	Katılmıyorum	Kesinlikle katılmıyorum	Katılmıyorum	Kesinlikle katılmıyorum	Katılmıyorum	Kesinlikle katılmıyorum	Katılmıyorum
2025-10-02 15:24:22	Evet	Erkek	20-21	5. Sınıf	Katılmıyorum	Katılmıyorum	Katılmıyorum	Katılmıyorum	Kesinlikle katılmıyorum	Kesinlikle katılmıyorum	Kesinlikle katılmıyorum	Kesinlikle katılmıyorum	Kesinlikle katılmıyorum	Kesinlikle katılmıyorum	Kesinlikle katılmıyorum	Kesinlikle katılmıyorum	Kesinlikle katılmıyorum	Kesinlikle katılmıyorum	Kesinlikle katılmıyorum	Kesinlikle katılmıyorum	Katılmıyorum	Katılmıyorum	Katılmıyorum	Kesinlikle katılmıyorum	Kesinlikle katılmıyorum	Katılmıyorum
2025-10-03 21:27:06	Evet	Erkek	18-19	2. Sınıf	Katılıyorum	Kesinlikle katılıyorum	Kararsızım	Katılıyorum	Katılıyorum	Kesinlikle katılıyorum	Katılıyorum	Kararsızım	Katılıyorum	Katılıyorum	Kesinlikle katılıyorum	Kesinlikle katılıyorum	Katılıyorum	Katılıyorum	Katılıyorum	Kararsızım	Katılmıyorum	Kesinlikle katılıyorum	Katılıyorum	Katılıyorum	Kararsızım	Katılıyorum
2025-10-05 18:40:11	Evet	Kadın	22-23	3. Sınıf	Kararsızım	Katılıyorum	Katılmıyorum	Kararsızım	Kararsızım	Katılıyorum	Katılıyorum	Katılıyorum	Katılıyorum	Katılıyorum	Katılıyorum	Katılıyorum	Katılıyorum	Katılıyorum	Katılıyorum	Kararsızım	Kararsızım	Kararsızım	Katılıyorum	Katılıyorum	Katılıyorum	Katılıyorum
2025-10-06 11:02:00	Evet	Kadın	20-21	3. Sınıf	Kararsızım	Kararsızım	Kararsızım	Kararsızım	Kararsızım	Katılıyorum	Katılıyorum	Katılıyorum	Katılıyorum	Katılıyorum	Katılıyorum	Katılıyorum	Katılıyorum	Katılıyorum	Kararsızım	Katılıyorum	Katılıyorum	Katılıyorum	Katılıyorum	Katılıyorum	Katılıyorum	Katılıyorum
2025-10-06 11:14:42	Evet	Kadın	20-21	3. Sınıf	Katılıyorum	Katılıyorum	Katılıyorum	Katılıyorum	Kararsızım	Kararsızım	Katılıyorum	Katılıyorum	Kararsızım	Katılıyorum	Katılıyorum	Katılıyorum	Katılıyorum	Kesinlikle katılıyorum	Kararsızım	Katılıyorum	Katılıyorum	Kesinlikle katılıyorum	Kesinlikle katılıyorum	Kararsızım	Kararsızım	Katılmıyorum
2025-10-06 11:19:09	Evet	Kadın	18-19	3. Sınıf	Kararsızım	Kararsızım	Katılıyorum	Katılıyorum	Katılıyorum	Katılıyorum	Katılıyorum	Katılıyorum	Katılıyorum	Katılıyorum	Katılıyorum	Katılıyorum	Katılıyorum	Katılıyorum	Katılıyorum	Katılıyorum	Katılıyorum	Kesinlikle katılıyorum	Kesinlikle katılıyorum	Katılıyorum	Katılıyorum	Katılıyorum
2025-10-07 20:27:06	Evet	Kadın	20-21	3. Sınıf	Katılıyorum	Katılıyorum	Kararsızım	Kararsızım	Katılıyorum	Kararsızım	Katılıyorum	Katılıyorum	Katılıyorum	Katılıyorum	Katılıyorum	Katılıyorum	Kararsızım	Katılıyorum	Kararsızım	Katılıyorum	Katılıyorum	Katılıyorum	Kararsızım	Katılıyorum	Katılıyorum	Kararsızım
2025-10-07 22:02:30	Evet	Kadın	20-21	3. Sınıf	Kararsızım	Katılıyorum	Katılmıyorum	Kesinlikle katılıyorum	Kararsızım	Katılıyorum	Kesinlikle katılıyorum	Katılıyorum	Katılıyorum	Kesinlikle katılıyorum	Kesinlikle katılıyorum	Kesinlikle katılıyorum	Kesinlikle katılıyorum	Kesinlikle katılıyorum	Kesinlikle katılıyorum	Katılmıyorum	Kararsızım	Kararsızım	Katılıyorum	Katılıyorum	Katılıyorum	Katılıyorum
2025-10-09 13:32:25	Evet	Kadın	22-23	3. Sınıf	Katılıyorum	Katılıyorum	Katılıyorum	Katılıyorum	Katılıyorum	Katılıyorum	Katılıyorum	Katılıyorum	Katılıyorum	Katılıyorum	Kesinlikle katılıyorum	Kesinlikle katılıyorum	Kesinlikle katılıyorum	Kesinlikle katılıyorum	Kesinlikle katılıyorum	Katılıyorum	Kesinlikle katılıyorum	Kesinlikle katılıyorum	Kesinlikle katılıyorum	Kesinlikle katılıyorum	Kesinlikle katılıyorum	Kesinlikle katılıyorum
2025-10-09 13:33:06	Evet	Kadın	20-21	3. Sınıf	Kararsızım	Kararsızım	Katılıyorum	Katılıyorum	Katılıyorum	Katılıyorum	Katılıyorum	Katılıyorum	Katılıyorum	Katılıyorum	Katılıyorum	Katılıyorum	Katılıyorum	Katılıyorum	Katılıyorum	Katılıyorum	Katılıyorum	Katılıyorum	Katılıyorum	Katılıyorum	Katılıyorum	Katılıyorum
2025-10-09 13:33:34	Evet	Erkek	20-21	3. Sınıf	Kararsızım	Katılıyorum	Kararsızım	Katılıyorum	Katılıyorum	Kesinlikle katılıyorum	Katılıyorum	Katılıyorum	Kararsızım	Katılıyorum	Katılıyorum	Katılıyorum	Katılıyorum	Kesinlikle katılıyorum	Katılıyorum	Katılıyorum	Katılıyorum	Katılıyorum	Kesinlikle katılıyorum	Katılıyorum	Kararsızım	Katılıyorum
2025-10-09 13:33:43	Evet	Kadın	20-21	3. Sınıf	Kararsızım	Kararsızım	Katılıyorum	Katılıyorum	Katılıyorum	Katılıyorum	Katılıyorum	Kesinlikle katılıyorum	Katılıyorum	Katılıyorum	Kesinlikle katılıyorum	Kesinlikle katılıyorum	Kesinlikle katılıyorum	Kesinlikle katılıyorum	Katılıyorum	Katılıyorum	Katılıyorum	Katılıyorum	Kesinlikle katılıyorum	Kesinlikle katılıyorum	Kesinlikle katılıyorum	Katılıyorum
2025-10-09 13:35:31	Evet	Kadın	18-19	3. Sınıf	Kararsızım	Kararsızım	Kararsızım	Kararsızım	Kararsızım	Kararsızım	Kararsızım	Kararsızım	Kararsızım	Kararsızım	Kararsızım	Katılıyorum	Kararsızım	Kesinlikle katılıyorum	Kararsızım	Kararsızım	Kararsızım	Kararsızım	Kararsızım	Kararsızım	Kararsızım	Kararsızım
2025-10-09 13:36:41	Evet	Kadın	20-21	3. Sınıf	Katılıyorum	Katılıyorum	Kararsızım	Kararsızım	Katılıyorum	Kararsızım	Kesinlikle katılıyorum	Katılıyorum	Kesinlikle katılıyorum	Katılıyorum	Kesinlikle katılıyorum	Kesinlikle katılıyorum	Kesinlikle katılıyorum	Kesinlikle katılıyorum	Kesinlikle katılıyorum	Kesinlikle katılıyorum	Kesinlikle katılıyorum	Kesinlikle katılıyorum	Kesinlikle katılıyorum	Kesinlikle katılıyorum	Kesinlikle katılıyorum	Kesinlikle katılıyorum
2025-10-09 13:37:49	Evet	Erkek	20-21	3. Sınıf	Kesinlikle katılıyorum	Katılıyorum	Katılıyorum	Katılıyorum	Katılıyorum	Katılıyorum	Kararsızım	Kararsızım	Kararsızım	Kararsızım	Katılıyorum	Katılıyorum	Kararsızım	Katılıyorum	Katılıyorum	Katılıyorum	Kararsızım	Katılıyorum	Katılıyorum	Katılıyorum	Kararsızım	Katılıyorum
2025-10-09 13:39:20	Evet	Erkek	20-21	3. Sınıf	Kararsızım	Katılmıyorum	Katılmıyorum	Katılmıyorum	Katılmıyorum	Katılmıyorum	Kararsızım	Katılmıyorum	Kararsızım	Kararsızım	Katılıyorum	Katılıyorum	Katılıyorum	Katılıyorum	Kararsızım	Kararsızım	Katılmıyorum	Katılmıyorum	Kararsızım	Katılıyorum	Katılıyorum	Kararsızım
2025-10-09 13:39:25	Evet	Kadın	20-21	3. Sınıf	Katılmıyorum	Kesinlikle katılmıyorum	Kesinlikle katılmıyorum	Kesinlikle katılmıyorum	Katılıyorum	Katılmıyorum	Katılıyorum	Katılıyorum	Katılıyorum	Katılıyorum	Kesinlikle katılıyorum	Kesinlikle katılıyorum	Kesinlikle katılıyorum	Kesinlikle katılıyorum	Kesinlikle katılıyorum	Kesinlikle katılıyorum	Kesinlikle katılıyorum	Katılıyorum	Katılıyorum	Kesinlikle katılıyorum	Kesinlikle katılıyorum	Katılıyorum
2025-10-09 13:39:59	Evet	Kadın	20-21	3. Sınıf	Katılmıyorum	Katılmıyorum	Kararsızım	Katılmıyorum	Kararsızım	Katılmıyorum	Katılmıyorum	Katılıyorum	Kararsızım	Kararsızım	Kararsızım	Katılıyorum	Kararsızım	Katılıyorum	Kararsızım	Kararsızım	Kararsızım	Kararsızım	Katılıyorum	Kararsızım	Katılıyorum	Katılıyorum
2025-10-09 14:03:07	Evet	Kadın	20-21	3. Sınıf	Kesinlikle katılmıyorum	Kesinlikle katılmıyorum	Kesinlikle katılmıyorum	Katılmıyorum	Kesinlikle katılmıyorum	Kesinlikle katılmıyorum	Katılıyorum	Kesinlikle katılıyorum	Katılmıyorum	Katılmıyorum	Kararsızım	Katılıyorum	Kararsızım	Kesinlikle katılıyorum	Kesinlikle katılıyorum	Katılıyorum	Katılıyorum	Katılıyorum	Kesinlikle katılıyorum	Kesinlikle katılıyorum	Kesinlikle katılıyorum	Katılıyorum
2025-10-09 16:40:47	Evet	Erkek	18-19	2. Sınıf	Katılmıyorum	Katılmıyorum	Kesinlikle katılmıyorum	Katılmıyorum	Kararsızım	Kararsızım	Kesinlikle katılıyorum	Kesinlikle katılıyorum	Kesinlikle katılıyorum	Kesinlikle katılıyorum	Kesinlikle katılıyorum	Kesinlikle katılıyorum	Katılmıyorum	Kesinlikle katılıyorum	Kararsızım	Kararsızım	Katılıyorum	Katılıyorum	Katılıyorum	Kararsızım	Kararsızım	Kararsızım
2025-10-10 07:30:56	Evet	Erkek	20-21	3. Sınıf	Kararsızım	Kararsızım	Kararsızım	Kararsızım	Kararsızım	Kararsızım	Kararsızım	Katılıyorum	Katılıyorum	Katılıyorum	Kararsızım	Kesinlikle katılıyorum	Katılıyorum	Kesinlikle katılıyorum	Katılıyorum	Kararsızım	Kararsızım	Katılmıyorum	Kararsızım	Kararsızım	Kararsızım	Kararsızım
2025-10-31 10:30:29	Evet	Kadın	20-21	3. Sınıf	Kararsızım	Katılmıyorum	Katılmıyorum	Katılıyorum	Katılıyorum	Kararsızım	Katılmıyorum	Katılmıyorum	Katılıyorum	Katılıyorum	Kesinlikle katılıyorum	Kesinlikle katılıyorum	Katılıyorum	Kesinlikle katılıyorum	Katılıyorum	Kesinlikle katılıyorum	Kesinlikle katılmıyorum	Katılıyorum	Kesinlikle katılmıyorum	Katılıyorum	Katılmıyorum	Katılmıyorum
2025-10-31 10:39:18	Evet	Kadın	22-23	3. Sınıf	Kararsızım	Kararsızım	Kararsızım	Katılmıyorum	Katılmıyorum	Katılıyorum	Katılıyorum	Katılıyorum	Katılıyorum	Katılıyorum	Katılıyorum	Katılıyorum	Katılıyorum	Katılıyorum	Katılıyorum	Katılıyorum	Katılıyorum	Katılıyorum	Katılıyorum	Katılıyorum	Katılıyorum	Katılıyorum
2025-11-05 14:40:43	Evet	Erkek	20-21	2. Sınıf	Katılıyorum	Katılıyorum	Katılıyorum	Katılıyorum	Katılıyorum	Katılıyorum	Katılıyorum	Katılıyorum	Katılıyorum	Katılıyorum	Katılıyorum	Katılıyorum	Katılıyorum	Katılıyorum	Katılıyorum	Katılıyorum	Katılıyorum	Katılıyorum	Katılıyorum	Katılıyorum	Katılıyorum	Katılıyorum
2025-11-05 14:41:59	Evet	Erkek	18-19	2. Sınıf	Katılıyorum	Katılıyorum	Kararsızım	Kararsızım	Kararsızım	Katılıyorum	Katılıyorum	Katılıyorum	Katılıyorum	Katılıyorum	Katılıyorum	Katılıyorum	Katılıyorum	Katılıyorum	Katılıyorum	Katılıyorum	Katılıyorum	Katılıyorum	Katılıyorum	Katılıyorum	Katılıyorum	Katılıyorum
2025-11-05 14:42:02	Evet	Erkek	18-19	2. Sınıf	Katılmıyorum	Kararsızım	Katılmıyorum	Kararsızım	Katılıyorum	Katılıyorum	Kararsızım	Kararsızım	Kesinlikle katılıyorum	Katılıyorum	Kararsızım	Katılıyorum	Katılıyorum	Katılıyorum	Katılmıyorum	Kararsızım	Kesinlikle katılmıyorum	Kesinlikle katılıyorum	Katılıyorum	Kesinlikle katılıyorum	Kesinlikle katılıyorum	Kesinlikle katılmıyorum
2025-11-05 14:42:16	Evet	Kadın	18-19	2. Sınıf	Kararsızım	Kararsızım	Katılmıyorum	Katılmıyorum	Kararsızım	Kararsızım	Kararsızım	Kararsızım	Kararsızım	Kararsızım	Katılıyorum	Katılıyorum	Kararsızım	Kararsızım	Kararsızım	Kararsızım	Kararsızım	Kararsızım	Kararsızım	Kararsızım	Katılmıyorum	Katılmıyorum
2025-11-05 14:42:59	Evet	Erkek	20-21	2. Sınıf	Katılmıyorum	Katılıyorum	Kararsızım	Kararsızım	Katılıyorum	Katılmıyorum	Kararsızım	Katılıyorum	Katılmıyorum	Kararsızım	Katılıyorum	Kararsızım	Katılmıyorum	Kararsızım	Kararsızım	Katılıyorum	Katılmıyorum	Kararsızım	Katılıyorum	Kararsızım	Katılmıyorum	Kararsızım
2025-11-05 14:43:03	Evet	Erkek	18-19	2. Sınıf	Katılıyorum	Kararsızım	Kararsızım	Katılıyorum	Katılıyorum	Katılıyorum	Kararsızım	Katılıyorum	Kararsızım	Katılıyorum	Katılıyorum	Kararsızım	Katılmıyorum	Kararsızım	Kararsızım	Katılıyorum	Katılıyorum	Katılıyorum	Katılıyorum	Kararsızım	Kararsızım	Katılıyorum
2025-11-05 14:43:04	Evet	Erkek	18-19	2. Sınıf	Katılmıyorum	Katılmıyorum	Kesinlikle katılmıyorum	Kesinlikle katılmıyorum	Kesinlikle katılmıyorum	Kesinlikle katılmıyorum	Kararsızım	Kesinlikle katılmıyorum	Katılıyorum	Kesinlikle katılıyorum	Katılıyorum	Kararsızım	Kararsızım	Kesinlikle katılıyorum	Kararsızım	Katılıyorum	Kesinlikle katılmıyorum	Kesinlikle katılmıyorum	Kesinlikle katılmıyorum	Katılmıyorum	Katılıyorum	Kararsızım
2025-11-05 14:43:07	Evet	Kadın	20-21	2. Sınıf	Katılıyorum	Katılıyorum	Katılmıyorum	Kararsızım	Kararsızım	Kararsızım	Katılıyorum	Katılıyorum	Katılıyorum	Katılıyorum	Katılıyorum	Kesinlikle katılıyorum	Katılıyorum	Katılıyorum	Katılıyorum	Katılıyorum	Katılıyorum	Katılıyorum	Katılıyorum	Kararsızım	Kararsızım	Kararsızım
2025-11-05 14:43:07	Evet	Kadın	18-19	2. Sınıf	Katılmıyorum	Katılmıyorum	Katılıyorum	Katılmıyorum	Katılıyorum	Katılıyorum	Katılmıyorum	Katılıyorum	Katılıyorum	Katılmıyorum	Katılıyorum	Katılıyorum	Kararsızım	Kesinlikle katılıyorum	Kesinlikle katılıyorum	Kararsızım	Kararsızım	Katılıyorum	Katılıyorum	Katılıyorum	Kararsızım	Katılmıyorum
2025-11-05 14:43:09	Evet	Erkek	20-21	2. Sınıf	Katılıyorum	Katılıyorum	Kararsızım	Kararsızım	Kararsızım	Katılıyorum	Kararsızım	Katılıyorum	Katılıyorum	Kararsızım	Kararsızım	Katılıyorum	Katılıyorum	Kararsızım	Katılıyorum	Katılıyorum	Kararsızım	Kararsızım	Kararsızım	Katılıyorum	Kararsızım	Kararsızım
2025-11-05 14:43:17	Evet	Kadın	18-19	2. Sınıf	Katılmıyorum	Katılmıyorum	Katılmıyorum	Katılmıyorum	Katılıyorum	Katılıyorum	Katılıyorum	Kararsızım	Kararsızım	Kararsızım	Kararsızım	Katılıyorum	Katılıyorum	Katılıyorum	Kararsızım	Katılıyorum	Kararsızım	Kararsızım	Katılıyorum	Kararsızım	Katılıyorum	Kararsızım
2025-11-05 14:43:19	Evet	Erkek	18-19	2. Sınıf	Kararsızım	Kararsızım	Kararsızım	Kararsızım	Kararsızım	Kararsızım	Kararsızım	Kararsızım	Kararsızım	Kararsızım	Kararsızım	Kararsızım	Kararsızım	Kararsızım	Kararsızım	Kararsızım	Kararsızım	Kararsızım	Kararsızım	Kararsızım	Kararsızım	Kararsızım
2025-11-05 14:43:24	Evet	Erkek	18-19	2. Sınıf	Katılmıyorum	Katılmıyorum	Katılmıyorum	Katılmıyorum	Katılmıyorum	Katılmıyorum	Katılmıyorum	Kesinlikle katılıyorum	Katılmıyorum	Kararsızım	Kararsızım	Kararsızım	Kararsızım	Kararsızım	Kararsızım	Kararsızım	Kararsızım	Kararsızım	Kararsızım	Kararsızım	Kararsızım	Kararsızım
2025-11-05 14:43:32	Evet	Kadın	18-19	2. Sınıf	Kararsızım	Kararsızım	Katılmıyorum	Kararsızım	Katılıyorum	Katılmıyorum	Katılıyorum	Katılıyorum	Katılıyorum	Katılıyorum	Katılıyorum	Katılıyorum	Katılıyorum	Katılıyorum	Kesinlikle katılıyorum	Kararsızım	Kararsızım	Katılıyorum	Katılıyorum	Katılıyorum	Katılıyorum	Kararsızım
2025-11-05 14:43:34	Evet	Kadın	20-21	2. Sınıf	Katılmıyorum	Katılıyorum	Kararsızım	Katılmıyorum	Katılıyorum	Kararsızım	Katılmıyorum	Kesinlikle katılmıyorum	Katılmıyorum	Katılmıyorum	Katılmıyorum	Kararsızım	Katılmıyorum	Katılmıyorum	Kesinlikle katılıyorum	Katılıyorum	Kararsızım	Katılmıyorum	Katılıyorum	Katılmıyorum	Kararsızım	Kesinlikle katılmıyorum
2025-11-05 14:43:43	Evet	Kadın	20-21	2. Sınıf	Katılıyorum	Katılıyorum	Kararsızım	Kararsızım	Katılıyorum	Katılıyorum	Katılıyorum	Katılıyorum	Katılıyorum	Katılıyorum	Katılıyorum	Katılıyorum	Katılıyorum	Katılıyorum	Katılıyorum	Katılıyorum	Kararsızım	Kararsızım	Katılıyorum	Kararsızım	Kararsızım	Katılıyorum
2025-11-05 14:43:51	Evet	Erkek	22-23	2. Sınıf	Kesinlikle katılmıyorum	Kesinlikle katılmıyorum	Kesinlikle katılmıyorum	Kesinlikle katılmıyorum	Kesinlikle katılmıyorum	Kesinlikle katılmıyorum	Kesinlikle katılmıyorum	Kesinlikle katılmıyorum	Kesinlikle katılmıyorum	Kesinlikle katılmıyorum	Kesinlikle katılmıyorum	Kesinlikle katılmıyorum	Kesinlikle katılmıyorum	Kesinlikle katılmıyorum	Kesinlikle katılmıyorum	Kesinlikle katılmıyorum	Kesinlikle katılmıyorum	Kesinlikle katılmıyorum	Kesinlikle katılmıyorum	Kesinlikle katılmıyorum	Kesinlikle katılmıyorum	Kesinlikle katılmıyorum
2025-11-05 14:43:52	Evet	Erkek	20-21	2. Sınıf	Kararsızım	Kararsızım	Katılıyorum	Katılıyorum	Katılıyorum	Katılıyorum	Katılıyorum	Kararsızım	Katılıyorum	Katılıyorum	Katılıyorum	Katılıyorum	Katılıyorum	Katılıyorum	Katılmıyorum	Katılıyorum	Katılıyorum	Katılıyorum	Katılıyorum	Katılıyorum	Katılıyorum	Katılıyorum
2025-11-05 14:43:57	Evet	Erkek	20-21	2. Sınıf	Katılmıyorum	Katılmıyorum	Katılmıyorum	Katılmıyorum	Katılmıyorum	Katılmıyorum	Katılmıyorum	Katılmıyorum	Katılmıyorum	Katılmıyorum	Katılmıyorum	Katılmıyorum	Katılmıyorum	Katılmıyorum	Katılmıyorum	Katılmıyorum	Katılmıyorum	Katılmıyorum	Katılmıyorum	Katılmıyorum	Katılmıyorum	Katılmıyorum
2025-11-05 14:43:57	Evet	Kadın	20-21	2. Sınıf	Kararsızım	Katılıyorum	Katılmıyorum	Kararsızım	Kesinlikle katılıyorum	Katılıyorum	Kesinlikle katılıyorum	Katılıyorum	Kararsızım	Katılıyorum	Kararsızım	Kararsızım	Kararsızım	Katılıyorum	Katılıyorum	Kararsızım	Katılmıyorum	Katılıyorum	Kararsızım	Kararsızım	Kararsızım	Kararsızım
2025-11-05 14:44:05	Evet	Erkek	20-21	2. Sınıf	Katılmıyorum	Katılmıyorum	Katılmıyorum	Katılmıyorum	Katılıyorum	Katılıyorum	Kararsızım	Katılıyorum	Kararsızım	Katılıyorum	Kararsızım	Kararsızım	Katılıyorum	Katılmıyorum	Kararsızım	Katılmıyorum	Katılıyorum	Katılıyorum	Kararsızım	Katılıyorum	Kararsızım	Katılıyorum
2025-11-05 14:44:07	Evet	Kadın	18-19	2. Sınıf	Kararsızım	Kararsızım	Kararsızım	Kararsızım	Kararsızım	Kararsızım	Kararsızım	Katılıyorum	Katılıyorum	Katılıyorum	Katılıyorum	Katılıyorum	Katılıyorum	Katılıyorum	Kararsızım	Katılıyorum	Katılıyorum	Kararsızım	Katılıyorum	Katılıyorum	Kararsızım	Kesinlikle katılmıyorum
2025-11-05 14:44:13	Evet	Kadın	20-21	2. Sınıf	Katılıyorum	Katılıyorum	Katılıyorum	Kararsızım	Kararsızım	Katılıyorum	Kararsızım	Kararsızım	Katılıyorum	Katılıyorum	Katılıyorum	Katılıyorum	Katılıyorum	Katılıyorum	Katılıyorum	Katılıyorum	Katılıyorum	Katılıyorum	Katılıyorum	Katılıyorum	Katılıyorum	Katılıyorum
2025-11-05 14:44:17	Evet	Erkek	18-19	2. Sınıf	Kararsızım	Kararsızım	Kararsızım	Kararsızım	Katılıyorum	Katılıyorum	Katılıyorum	Kesinlikle katılıyorum	Kesinlikle katılıyorum	Kesinlikle katılıyorum	Kesinlikle katılıyorum	Katılıyorum	Katılmıyorum	Katılıyorum	Kararsızım	Kararsızım	Kesinlikle katılmıyorum	Kararsızım	Katılıyorum	Katılıyorum	Kararsızım	Kararsızım
2025-11-05 14:44:19	Evet	Kadın	18-19	2. Sınıf	Katılıyorum	Katılıyorum	Katılmıyorum	Katılmıyorum	Katılmıyorum	Katılmıyorum	Katılmıyorum	Kararsızım	Kararsızım	Kararsızım	Katılıyorum	Kararsızım	Kararsızım	Katılıyorum	Kararsızım	Katılmıyorum	Katılmıyorum	Kararsızım	Katılmıyorum	Kararsızım	Katılıyorum	Katılıyorum
2025-11-05 14:44:21	Evet	Erkek	18-19	2. Sınıf	Katılıyorum	Kararsızım	Katılıyorum	Katılıyorum	Katılıyorum	Katılıyorum	Kararsızım	Katılıyorum	Katılıyorum	Katılıyorum	Kesinlikle katılıyorum	Katılıyorum	Katılıyorum	Kesinlikle katılıyorum	Katılıyorum	Kararsızım	Kararsızım	Katılıyorum	Katılıyorum	Katılıyorum	Katılıyorum	Katılıyorum
2025-11-05 14:44:39	Evet	Erkek	18-19	2. Sınıf	Kararsızım	Kararsızım	Kararsızım	Kararsızım	Katılıyorum	Katılıyorum	Kesinlikle katılıyorum	Katılıyorum	Kesinlikle katılıyorum	Kesinlikle katılıyorum	Kesinlikle katılıyorum	Kesinlikle katılıyorum	Kesinlikle katılıyorum	Kesinlikle katılıyorum	Kesinlikle katılıyorum	Kesinlikle katılıyorum	Kesinlikle katılıyorum	Kesinlikle katılıyorum	Kesinlikle katılıyorum	Kesinlikle katılıyorum	Kesinlikle katılıyorum	Kesinlikle katılıyorum
2025-11-05 14:44:50	Evet	Kadın	20-21	2. Sınıf	Katılmıyorum	Katılmıyorum	Katılmıyorum	Kesinlikle katılmıyorum	Katılıyorum	Katılıyorum	Kararsızım	Katılmıyorum	Katılıyorum	Katılıyorum	Katılıyorum	Kararsızım	Kararsızım	Katılıyorum	Katılıyorum	Kararsızım	Katılmıyorum	Kararsızım	Katılıyorum	Kararsızım	Katılmıyorum	Katılmıyorum
2025-11-05 14:44:50	Evet	Kadın	20-21	2. Sınıf	Katılıyorum	Katılıyorum	Kararsızım	Kararsızım	Katılıyorum	Katılıyorum	Katılıyorum	Katılıyorum	Katılıyorum	Katılıyorum	Katılıyorum	Katılıyorum	Katılıyorum	Kararsızım	Kararsızım	Katılıyorum	Katılıyorum	Katılıyorum	Katılıyorum	Katılıyorum	Katılıyorum	Katılıyorum
2025-11-05 14:45:10	Evet	Erkek	18-19	2. Sınıf	Kararsızım	Katılıyorum	Katılmıyorum	Kararsızım	Katılıyorum	Katılıyorum	Katılıyorum	Kesinlikle katılıyorum	Kesinlikle katılıyorum	Katılıyorum	Kesinlikle katılıyorum	Katılıyorum	Kesinlikle katılıyorum	Kesinlikle katılıyorum	Katılıyorum	Kararsızım	Kararsızım	Kararsızım	Katılıyorum	Kesinlikle katılıyorum	Kesinlikle katılıyorum	Kesinlikle katılıyorum
2025-11-05 14:45:42	Evet	Kadın	18-19	2. Sınıf	Katılmıyorum	Katılmıyorum	Katılmıyorum	Katılmıyorum	Kararsızım	Kararsızım	Katılıyorum	Kesinlikle katılıyorum	Kararsızım	Katılıyorum	Katılıyorum	Katılıyorum	Kararsızım	Katılmıyorum	Katılıyorum	Kararsızım	Kesinlikle katılıyorum	Kesinlikle katılıyorum	Kesinlikle katılıyorum	Katılıyorum	Katılıyorum	Kesinlikle katılmıyorum
2025-11-05 14:45:54	Evet	Erkek	20-21	2. Sınıf	Kararsızım	Katılıyorum	Kararsızım	Kararsızım	Katılıyorum	Katılıyorum	Kararsızım	Katılıyorum	Katılıyorum	Katılıyorum	Katılıyorum	Katılıyorum	Katılıyorum	Katılıyorum	Katılıyorum	Katılıyorum	Kararsızım	Kararsızım	Kararsızım	Katılıyorum	Katılıyorum	Katılıyorum
2025-11-05 14:45:59	Evet	Erkek	20-21	2. Sınıf	Kararsızım	Kararsızım	Katılıyorum	Katılıyorum	Katılıyorum	Katılıyorum	Katılıyorum	Kararsızım	Katılıyorum	Katılıyorum	Katılıyorum	Katılıyorum	Katılıyorum	Kesinlikle katılıyorum	Katılıyorum	Kararsızım	Katılıyorum	Katılmıyorum	Katılıyorum	Katılmıyorum	Katılmıyorum	Kararsızım
2025-11-05 14:46:04	Evet	Erkek	20-21	2. Sınıf	Kararsızım	Katılmıyorum	Kararsızım	Kararsızım	Katılıyorum	Katılıyorum	Katılıyorum	Kararsızım	Katılıyorum	Katılıyorum	Kesinlikle katılıyorum	Katılıyorum	Katılıyorum	Kesinlikle katılıyorum	Katılıyorum	Katılıyorum	Katılıyorum	Katılıyorum	Katılıyorum	Katılıyorum	Katılıyorum	Katılıyorum
2025-11-05 14:46:54	Evet	Erkek	20-21	2. Sınıf	Katılmıyorum	Kararsızım	Katılıyorum	Kararsızım	Kararsızım	Kararsızım	Katılıyorum	Katılıyorum	Katılıyorum	Katılıyorum	Katılıyorum	Katılıyorum	Katılmıyorum	Katılıyorum	Katılıyorum	Katılıyorum	Katılmıyorum	Katılmıyorum	Kararsızım	Kararsızım	Katılıyorum	Katılıyorum
2025-11-05 14:46:55	Evet	Kadın	18-19	2. Sınıf	Kararsızım	Katılıyorum	Kararsızım	Katılıyorum	Katılıyorum	Katılıyorum	Katılıyorum	Katılıyorum	Katılıyorum	Katılıyorum	Katılıyorum	Katılıyorum	Katılıyorum	Katılıyorum	Kesinlikle katılıyorum	Kesinlikle katılıyorum	Katılıyorum	Katılıyorum	Kararsızım	Katılıyorum	Kararsızım	Katılıyorum
2025-11-05 14:47:13	Evet	Erkek	18-19	2. Sınıf	Kararsızım	Kararsızım	Katılıyorum	Katılıyorum	Kararsızım	Katılıyorum	Kararsızım	Kararsızım	Katılmıyorum	Katılmıyorum	Katılıyorum	Katılıyorum	Katılıyorum	Katılıyorum	Katılıyorum	Katılıyorum	Katılıyorum	Katılıyorum	Katılıyorum	Katılıyorum	Katılıyorum	Kararsızım
2025-11-05 14:48:28	Evet	Erkek	20-21	2. Sınıf	Katılmıyorum	Kesinlikle katılmıyorum	Katılmıyorum	Kesinlikle katılmıyorum	Kesinlikle katılmıyorum	Katılmıyorum	Kesinlikle katılmıyorum	Katılmıyorum	Katılmıyorum	Kesinlikle katılmıyorum	Katılmıyorum	Kesinlikle katılmıyorum	Kesinlikle katılmıyorum	Kesinlikle katılmıyorum	Katılmıyorum	Kesinlikle katılmıyorum	Katılmıyorum	Katılmıyorum	Katılmıyorum	Kesinlikle katılmıyorum	Kesinlikle katılmıyorum	Katılmıyorum
2025-11-05 14:48:52	Evet	Erkek	18-19	2. Sınıf	Katılmıyorum	Katılmıyorum	Katılmıyorum	Katılmıyorum	Katılmıyorum	Kesinlikle katılıyorum	Kararsızım	Katılıyorum	Katılıyorum	Katılıyorum	Katılıyorum	Kararsızım	Katılıyorum	Kesinlikle katılıyorum	Katılıyorum	Katılıyorum	Kararsızım	Katılıyorum	Katılıyorum	Katılıyorum	Katılıyorum	Katılıyorum
2025-11-05 14:49:07	Evet	Erkek	18-19	2. Sınıf	Katılıyorum	Katılmıyorum	Kararsızım	Kararsızım	Katılıyorum	Katılıyorum	Katılmıyorum	Katılıyorum	Katılıyorum	Kararsızım	Kesinlikle katılıyorum	Kararsızım	Kesinlikle katılıyorum	Katılıyorum	Katılıyorum	Katılıyorum	Katılıyorum	Katılıyorum	Kararsızım	Katılıyorum	Kararsızım	Kesinlikle katılmıyorum
2025-11-05 14:49:13	Evet	Kadın	18-19	2. Sınıf	Katılmıyorum	Katılmıyorum	Katılmıyorum	Katılmıyorum	Katılmıyorum	Kararsızım	Kesinlikle katılmıyorum	Kararsızım	Kararsızım	Kararsızım	Kesinlikle katılmıyorum	Kesinlikle katılmıyorum	Kesinlikle katılmıyorum	Kesinlikle katılmıyorum	Kesinlikle katılmıyorum	Kesinlikle katılmıyorum	Kesinlikle katılmıyorum	Kesinlikle katılmıyorum	Kararsızım	Kesinlikle katılmıyorum	Kesinlikle katılmıyorum	Kesinlikle katılmıyorum
2025-11-05 14:51:56	Evet	Kadın	20-21	2. Sınıf	Katılmıyorum	Kesinlikle katılmıyorum	Kesinlikle katılmıyorum	Katılmıyorum	Kesinlikle katılmıyorum	Katılmıyorum	Kesinlikle katılmıyorum	Katılmıyorum	Katılmıyorum	Kesinlikle katılmıyorum	Katılmıyorum	Katılmıyorum	Kesinlikle katılmıyorum	Katılmıyorum	Kesinlikle katılmıyorum	Katılmıyorum	Katılmıyorum	Katılmıyorum	Katılmıyorum	Katılmıyorum	Kesinlikle katılmıyorum	Kesinlikle katılmıyorum
2025-11-05 14:59:11	Evet	Erkek	20-21	2. Sınıf	Katılmıyorum	Katılmıyorum	Kararsızım	Kararsızım	Katılıyorum	Kararsızım	Kararsızım	Kararsızım	Kararsızım	Kararsızım	Kararsızım	Kararsızım	Kararsızım	Katılıyorum	Katılıyorum	Kararsızım	Katılıyorum	Katılıyorum	Katılıyorum	Katılıyorum	Katılıyorum	Katılmıyorum
2025-11-05 15:04:25	Evet	Erkek	18-19	2. Sınıf	Katılıyorum	Kararsızım	Katılıyorum	Katılıyorum	Katılıyorum	Kesinlikle katılıyorum	Kesinlikle katılıyorum	Kararsızım	Katılıyorum	Kesinlikle katılıyorum	Katılıyorum	Katılıyorum	Kararsızım	Kesinlikle katılıyorum	Kararsızım	Katılıyorum	Kararsızım	Katılıyorum	Katılıyorum	Kararsızım	Katılıyorum	Kararsızım
2025-11-05 15:05:04	Evet	Erkek	18-19	2. Sınıf	Katılıyorum	Katılıyorum	Katılıyorum	Katılıyorum	Kararsızım	Katılıyorum	Kesinlikle katılıyorum	Katılıyorum	Kararsızım	Kararsızım	Katılıyorum	Katılıyorum	Katılıyorum	Kararsızım	Katılmıyorum	Katılmıyorum	Kararsızım	Kararsızım	Katılmıyorum	Katılıyorum	Katılmıyorum	Kararsızım
2025-11-10 14:25:23	Evet	Erkek	24-25	5. Sınıf	Kesinlikle katılmıyorum	Kesinlikle katılmıyorum	Katılmıyorum	Katılmıyorum	Kesinlikle katılmıyorum	Katılmıyorum	Kesinlikle katılmıyorum	Kesinlikle katılmıyorum	Kesinlikle katılmıyorum	Katılmıyorum	Katılmıyorum	Kesinlikle katılmıyorum	Kesinlikle katılmıyorum	Kesinlikle katılmıyorum	Kesinlikle katılmıyorum	Kesinlikle katılmıyorum	Katılmıyorum	Katılmıyorum	Katılmıyorum	Kesinlikle katılmıyorum	Katılmıyorum	Kesinlikle katılmıyorum
2025-11-10 14:26:12	Evet	Erkek	22-23	5. Sınıf	Katılıyorum	Katılıyorum	Katılmıyorum	Kesinlikle katılıyorum	Katılıyorum	Katılmıyorum	Kesinlikle katılıyorum	Kesinlikle katılıyorum	Kararsızım	Kesinlikle katılıyorum	Katılmıyorum	Kararsızım	Kesinlikle katılıyorum	Kesinlikle katılmıyorum	Kararsızım	Kesinlikle katılmıyorum	Katılmıyorum	Kesinlikle katılıyorum	Kesinlikle katılıyorum	Katılıyorum	Kararsızım	Kararsızım
2025-11-10 14:26:15	Evet	Kadın	22-23	5. Sınıf	Kararsızım	Katılıyorum	Katılmıyorum	Katılmıyorum	Katılmıyorum	Katılmıyorum	Kararsızım	Kararsızım	Katılıyorum	Kararsızım	Kararsızım	Kesinlikle katılıyorum	Kararsızım	Kararsızım	Kararsızım	Katılmıyorum	Kararsızım	Kararsızım	Katılıyorum	Katılıyorum	Kararsızım	Kararsızım
2025-11-10 14:26:20	Evet	Erkek	22-23	5. Sınıf	Katılmıyorum	Katılmıyorum	Katılmıyorum	Katılmıyorum	Katılmıyorum	Katılmıyorum	Katılmıyorum	Katılmıyorum	Kesinlikle katılmıyorum	Kesinlikle katılmıyorum	Kesinlikle katılmıyorum	Kesinlikle katılmıyorum	Kesinlikle katılmıyorum	Katılmıyorum	Kesinlikle katılmıyorum	Katılmıyorum	Katılmıyorum	Kesinlikle katılmıyorum	Katılmıyorum	Kesinlikle katılmıyorum	Katılmıyorum	Katılmıyorum
2025-11-10 14:36:41	Evet	Erkek	24-25	5. Sınıf	Kesinlikle katılmıyorum	Katılmıyorum	Kesinlikle katılmıyorum	Katılmıyorum	Kesinlikle katılmıyorum	Katılmıyorum	Kesinlikle katılmıyorum	Katılmıyorum	Kesinlikle katılmıyorum	Katılmıyorum	Kesinlikle katılmıyorum	Katılmıyorum	Katılmıyorum	Kesinlikle katılmıyorum	Katılmıyorum	Katılmıyorum	Kesinlikle katılmıyorum	Katılmıyorum	Katılmıyorum	Kesinlikle katılmıyorum	Katılmıyorum	Kesinlikle katılmıyorum
2025-11-10 14:37:32	Evet	Erkek	22-23	5. Sınıf	Kesinlikle katılmıyorum	Katılmıyorum	Kararsızım	Kararsızım	Kararsızım	Katılmıyorum	Kararsızım	Katılıyorum	Kesinlikle katılıyorum	Katılıyorum	Kararsızım	Kararsızım	Kararsızım	Katılmıyorum	Katılmıyorum	Katılmıyorum	Kararsızım	Kararsızım	Katılmıyorum	Kararsızım	Katılıyorum	Katılmıyorum
2025-11-12 13:18:20	Evet	Erkek	20-21	3. Sınıf	Kararsızım	Kararsızım	Katılmıyorum	Katılmıyorum	Kararsızım	Katılıyorum	Kararsızım	Katılıyorum	Katılıyorum	Kararsızım	Katılıyorum	Katılıyorum	Katılıyorum	Katılıyorum	Kararsızım	Kararsızım	Kararsızım	Katılıyorum	Kararsızım	Katılıyorum	Katılıyorum	Kararsızım
2025-11-13 13:04:17	Evet	Erkek	22-23	5. Sınıf	Kararsızım	Kararsızım	Katılıyorum	Katılıyorum	Katılıyorum	Katılıyorum	Katılıyorum	Katılıyorum	Katılıyorum	Katılıyorum	Katılıyorum	Katılıyorum	Katılıyorum	Katılıyorum	Katılıyorum	Katılıyorum	Kararsızım	Kesinlikle katılıyorum	Kesinlikle katılıyorum	Katılıyorum	Katılıyorum	Katılıyorum
2025-11-19 17:21:58	Evet	Kadın	20-21	4. Sınıf	Katılıyorum	Katılıyorum	Katılmıyorum	Katılmıyorum	Kararsızım	Katılıyorum	Katılmıyorum	Katılıyorum	Katılıyorum	Katılıyorum	Katılıyorum	Katılıyorum	Kararsızım	Katılıyorum	Katılıyorum	Kararsızım	Katılmıyorum	Katılmıyorum	Katılmıyorum	Katılıyorum	Katılıyorum	Kararsızım
2025-11-19 17:30:10	Evet	Kadın	22-23	4. Sınıf	Kararsızım	Kararsızım	Katılıyorum	Katılıyorum	Katılmıyorum	Katılıyorum	Katılıyorum	Katılıyorum	Katılıyorum	Katılıyorum	Katılıyorum	Katılıyorum	Kararsızım	Katılıyorum	Kararsızım	Katılıyorum	Kararsızım	Katılıyorum	Katılıyorum	Katılıyorum	Katılıyorum	Kararsızım
2025-11-19 17:32:55	Evet	Erkek	22-23	4. Sınıf	Kararsızım	Katılıyorum	Katılmıyorum	Katılmıyorum	Katılıyorum	Kararsızım	Katılmıyorum	Kararsızım	Katılıyorum	Kararsızım	Kararsızım	Katılıyorum	Kararsızım	Kesinlikle katılıyorum	Katılıyorum	Katılmıyorum	Katılmıyorum	Katılmıyorum	Katılıyorum	Katılıyorum	Katılıyorum	Katılıyorum
2025-11-19 17:56:51	Evet	Kadın	20-21	4. Sınıf	Katılıyorum	Katılıyorum	Katılıyorum	Katılıyorum	Kararsızım	Katılıyorum	Katılıyorum	Katılıyorum	Katılıyorum	Kesinlikle katılıyorum	Kesinlikle katılıyorum	Kesinlikle katılıyorum	Kesinlikle katılıyorum	Kesinlikle katılıyorum	Katılmıyorum	Kararsızım	Kararsızım	Katılıyorum	Katılmıyorum	Kesinlikle katılıyorum	Kesinlikle katılıyorum	Katılmıyorum
2025-11-19 18:09:52	Evet	Kadın	22-23	4. Sınıf	Kararsızım	Kararsızım	Katılmıyorum	Katılmıyorum	Kararsızım	Katılıyorum	Katılıyorum	Katılıyorum	Kesinlikle katılıyorum	Katılıyorum	Katılıyorum	Katılıyorum	Kararsızım	Kesinlikle katılıyorum	Kararsızım	Katılıyorum	Kararsızım	Katılıyorum	Katılıyorum	Katılıyorum	Katılıyorum	Kararsızım
2025-11-19 19:27:18	Evet	Erkek	20-21	4. Sınıf	Kesinlikle katılmıyorum	Kararsızım	Katılmıyorum	Katılmıyorum	Katılıyorum	Katılmıyorum	Katılmıyorum	Katılmıyorum	Kesinlikle katılıyorum	Kesinlikle katılıyorum	Kesinlikle katılıyorum	Kesinlikle katılıyorum	Kararsızım	Kesinlikle katılıyorum	Katılıyorum	Kesinlikle katılıyorum	Kararsızım	Kararsızım	Katılmıyorum	Katılıyorum	Katılıyorum	Katılıyorum
2025-11-19 19:52:51	Evet	Kadın	20-21	4. Sınıf	Kararsızım	Katılıyorum	Katılıyorum	Kararsızım	Kararsızım	Kararsızım	Kararsızım	Katılıyorum	Kararsızım	Katılıyorum	Katılıyorum	Kararsızım	Kararsızım	Kararsızım	Kararsızım	Kararsızım	Kararsızım	Kararsızım	Kararsızım	Katılıyorum	Kararsızım	Kararsızım
2025-11-19 20:05:37	Evet	Erkek	22-23	4. Sınıf	Kesinlikle katılıyorum	Katılıyorum	Kesinlikle katılıyorum	Kesinlikle katılıyorum	Katılıyorum	Kararsızım	Katılıyorum	Katılıyorum	Kesinlikle katılıyorum	Katılıyorum	Katılıyorum	Katılıyorum	Kesinlikle katılıyorum	Katılıyorum	Kesinlikle katılıyorum	Kesinlikle katılıyorum	Katılıyorum	Kesinlikle katılıyorum	Katılıyorum	Katılıyorum	Kesinlikle katılıyorum	Kesinlikle katılıyorum
2025-11-19 20:11:52	Evet	Kadın	22-23	4. Sınıf	Kararsızım	Kararsızım	Kararsızım	Kararsızım	Kararsızım	Kararsızım	Kararsızım	Kararsızım	Kararsızım	Kararsızım	Kararsızım	Kararsızım	Kararsızım	Kararsızım	Kararsızım	Kararsızım	Kararsızım	Kararsızım	Kararsızım	Kararsızım	Kararsızım	Kararsızım
2025-11-19 20:49:53	Evet	Kadın	20-21	4. Sınıf	Katılıyorum	Katılıyorum	Katılıyorum	Kararsızım	Katılıyorum	Katılıyorum	Kararsızım	Katılıyorum	Kesinlikle katılıyorum	Kesinlikle katılıyorum	Kesinlikle katılıyorum	Kesinlikle katılıyorum	Kesinlikle katılıyorum	Kesinlikle katılıyorum	Katılıyorum	Katılıyorum	Katılıyorum	Katılıyorum	Kararsızım	Kesinlikle katılıyorum	Kesinlikle katılıyorum	Katılıyorum
2025-11-20 17:24:25	Evet	Kadın	20-21	3. Sınıf	Katılmıyorum	Katılmıyorum	Katılmıyorum	Katılmıyorum	Kararsızım	Kararsızım	Kararsızım	Kararsızım	Katılıyorum	Katılıyorum	Kararsızım	Kararsızım	Kararsızım	Katılıyorum	Katılıyorum	Katılıyorum	Kararsızım	Kararsızım	Katılıyorum	Kararsızım	Kararsızım	Kararsızım
2025-11-20 20:33:03	Evet	Kadın	22-23	3. Sınıf	Katılmıyorum	Katılıyorum	Katılıyorum	Kesinlikle katılıyorum	Katılıyorum	Katılıyorum	Katılıyorum	Kararsızım	Katılıyorum	Katılıyorum	Kesinlikle katılıyorum	Katılıyorum	Katılıyorum	Kesinlikle katılıyorum	Kararsızım	Katılıyorum	Katılıyorum	Katılıyorum	Kesinlikle katılıyorum	Kesinlikle katılıyorum	Kesinlikle katılıyorum	Kesinlikle katılıyorum
2025-11-21 07:19:27	Evet	Kadın	20-21	3. Sınıf	Katılıyorum	Katılıyorum	Kararsızım	Katılıyorum	Kararsızım	Katılıyorum	Katılıyorum	Kesinlikle katılıyorum	Kesinlikle katılıyorum	Katılıyorum	Katılıyorum	Katılıyorum	Katılıyorum	Kesinlikle katılıyorum	Katılıyorum	Katılıyorum	Katılıyorum	Katılıyorum	Kararsızım	Katılıyorum	Katılıyorum	Katılıyorum
2025-11-23 09:17:08	Evet	Erkek	20-21	3. Sınıf	Kesinlikle katılıyorum	Kesinlikle katılıyorum	Katılıyorum	Katılıyorum	Katılıyorum	Katılıyorum	Katılıyorum	Katılıyorum	Katılıyorum	Katılıyorum	Katılıyorum	Kesinlikle katılıyorum	Katılıyorum	Katılıyorum	Katılıyorum	Katılıyorum	Katılıyorum	Katılıyorum	Katılıyorum	Katılıyorum	Katılıyorum	Katılıyorum
2025-11-24 17:44:01	Evet	Kadın	20-21	3. Sınıf	Katılıyorum	Katılıyorum	Kararsızım	Katılıyorum	Katılıyorum	Katılıyorum	Katılıyorum	Katılıyorum	Katılıyorum	Katılıyorum	Katılıyorum	Katılıyorum	Kararsızım	Kesinlikle katılıyorum	Katılıyorum	Katılıyorum	Kesinlikle katılıyorum	Kesinlikle katılıyorum	Kesinlikle katılıyorum	Kesinlikle katılıyorum	Kesinlikle katılıyorum	Kararsızım
2025-11-24 18:03:26	Evet	Kadın	20-21	3. Sınıf	Katılmıyorum	Kararsızım	Katılıyorum	Kararsızım	Kararsızım	Katılıyorum	Katılıyorum	Kesinlikle katılıyorum	Kesinlikle katılıyorum	Kesinlikle katılıyorum	Katılıyorum	Katılıyorum	Katılıyorum	Kesinlikle katılıyorum	Katılıyorum	Kesinlikle katılıyorum	Katılıyorum	Kararsızım	Katılıyorum	Kesinlikle katılıyorum	Kesinlikle katılıyorum	Katılıyorum
2025-11-24 18:40:01	Evet	Erkek	20-21	3. Sınıf	Kesinlikle katılıyorum	Katılıyorum	Kesinlikle katılıyorum	Kesinlikle katılıyorum	Katılıyorum	Katılıyorum	Katılıyorum	Kesinlikle katılıyorum	Kesinlikle katılıyorum	Katılıyorum	Kesinlikle katılıyorum	Kesinlikle katılıyorum	Kesinlikle katılıyorum	Kesinlikle katılıyorum	Kesinlikle katılıyorum	Kesinlikle katılıyorum	Kesinlikle katılıyorum	Kesinlikle katılıyorum	Kesinlikle katılıyorum	Katılıyorum	Kararsızım	Kararsızım
2025-11-25 13:42:38	Evet	Kadın	20-21	3. Sınıf	Kararsızım	Katılıyorum	Kararsızım	Katılıyorum	Katılıyorum	Katılıyorum	Kararsızım	Katılıyorum	Katılıyorum	Katılıyorum	Katılıyorum	Katılıyorum	Katılıyorum	Katılıyorum	Katılıyorum	Katılıyorum	Katılıyorum	Katılıyorum	Katılıyorum	Katılıyorum	Katılıyorum	Katılıyorum
2025-12-01 18:35:07	Evet	Kadın	20-21	3. Sınıf	Katılmıyorum	Katılmıyorum	Katılmıyorum	Katılmıyorum	Kararsızım	Kararsızım	Kararsızım	Kararsızım	Katılıyorum	Katılıyorum	Katılıyorum	Kararsızım	Kararsızım	Katılıyorum	Kararsızım	Katılıyorum	Katılmıyorum	Kararsızım	Katılıyorum	Katılıyorum	Katılıyorum	Kararsızım
2025-12-01 18:42:06	Evet	Kadın	20-21	3. Sınıf	Katılmıyorum	Kararsızım	Kararsızım	Kararsızım	Katılmıyorum	Kararsızım	Katılmıyorum	Katılmıyorum	Katılıyorum	Katılıyorum	Katılıyorum	Katılıyorum	Kararsızım	Katılıyorum	Kararsızım	Katılıyorum	Kararsızım	Katılıyorum	Katılıyorum	Katılıyorum	Katılıyorum	Kararsızım
2025-12-01 18:42:38	Evet	Kadın	20-21	3. Sınıf	Katılıyorum	Katılıyorum	Katılıyorum	Katılıyorum	Katılıyorum	Katılıyorum	Katılıyorum	Katılıyorum	Katılıyorum	Katılıyorum	Katılıyorum	Katılıyorum	Katılıyorum	Katılıyorum	Katılıyorum	Katılıyorum	Katılıyorum	Katılıyorum	Katılıyorum	Katılıyorum	Katılıyorum	Katılıyorum
2025-12-01 18:47:37	Evet	Kadın	20-21	3. Sınıf	Katılmıyorum	Katılmıyorum	Katılmıyorum	Katılmıyorum	Kararsızım	Katılmıyorum	Kararsızım	Katılıyorum	Kararsızım	Katılıyorum	Katılıyorum	Katılıyorum	Kararsızım	Katılıyorum	Kararsızım	Kararsızım	Kararsızım	Katılıyorum	Kararsızım	Katılıyorum	Kesinlikle katılıyorum	Kararsızım
2025-12-01 18:50:47	Evet	Kadın	20-21	3. Sınıf	Kararsızım	Katılıyorum	Katılmıyorum	Kararsızım	Katılmıyorum	Kararsızım	Katılmıyorum	Katılmıyorum	Katılmıyorum	Katılmıyorum	Kararsızım	Katılmıyorum	Kararsızım	Kararsızım	Kararsızım	Kararsızım	Kesinlikle katılıyorum	Kararsızım	Kararsızım	Katılıyorum	Katılıyorum	Katılıyorum
2025-12-03 11:21:58	Evet	Kadın	20-21	3. Sınıf	Katılıyorum	Kararsızım	Kararsızım	Kararsızım	Kararsızım	Katılıyorum	Katılıyorum	Katılıyorum	Katılıyorum	Katılıyorum	Katılıyorum	Katılıyorum	Katılıyorum	Kesinlikle katılıyorum	Katılıyorum	Katılıyorum	Katılıyorum	Katılıyorum	Katılıyorum	Katılıyorum	Katılıyorum	Katılıyorum
2025-12-03 12:36:35	Evet	Kadın	20-21	3. Sınıf	Kararsızım	Kararsızım	Katılmıyorum	Katılmıyorum	Katılıyorum	Katılıyorum	Katılıyorum	Katılıyorum	Katılıyorum	Katılıyorum	Kesinlikle katılıyorum	Kesinlikle katılıyorum	Katılıyorum	Kesinlikle katılıyorum	Katılıyorum	Kararsızım	Kesinlikle katılıyorum	Kesinlikle katılıyorum	Kesinlikle katılıyorum	Kesinlikle katılıyorum	Kesinlikle katılıyorum	Kararsızım
2025-12-04 14:19:06	Evet	Kadın	20-21	3. Sınıf	Kesinlikle katılıyorum	Kesinlikle katılıyorum	Kararsızım	Katılmıyorum	Katılıyorum	Katılıyorum	Kararsızım	Katılıyorum	Katılıyorum	Katılıyorum	Katılıyorum	Katılıyorum	Katılıyorum	Katılıyorum	Katılıyorum	Katılıyorum	Katılıyorum	Katılıyorum	Katılıyorum	Katılıyorum	Kararsızım	Katılmıyorum
2025-12-05 08:29:05	Evet	Erkek	18-19	2. Sınıf	Katılıyorum	Katılıyorum	Katılıyorum	Kararsızım	Katılıyorum	Katılıyorum	Katılıyorum	Kesinlikle katılıyorum	Katılıyorum	Kesinlikle katılıyorum	Kesinlikle katılıyorum	Katılıyorum	Kesinlikle katılıyorum	Katılıyorum	Katılıyorum	Katılmıyorum	Katılmıyorum	Kararsızım	Katılıyorum	Kesinlikle katılıyorum	Kesinlikle katılıyorum	Katılmıyorum
2025-12-05 09:33:52	Evet	Kadın	22-23	3. Sınıf	Katılıyorum	Katılıyorum	Katılıyorum	Katılıyorum	Katılıyorum	Katılıyorum	Kesinlikle katılıyorum	Kesinlikle katılıyorum	Kesinlikle katılıyorum	Kesinlikle katılıyorum	Katılıyorum	Kesinlikle katılıyorum	Katılıyorum	Kesinlikle katılıyorum	Katılıyorum	Kesinlikle katılıyorum	Kesinlikle katılıyorum	Katılıyorum	Kesinlikle katılıyorum	Kesinlikle katılıyorum	Katılıyorum	Katılıyorum
2025-12-05 09:35:33	Evet	Kadın	20-21	3. Sınıf	Katılıyorum	Katılmıyorum	Katılmıyorum	Katılmıyorum	Kararsızım	Katılıyorum	Katılıyorum	Katılıyorum	Katılıyorum	Katılıyorum	Katılıyorum	Katılıyorum	Katılıyorum	Katılıyorum	Katılıyorum	Katılıyorum	Katılıyorum	Katılıyorum	Katılıyorum	Katılıyorum	Katılıyorum	Katılıyorum
2025-12-05 09:36:20	Evet	Kadın	20-21	3. Sınıf	Kesinlikle katılmıyorum	Katılmıyorum	Katılmıyorum	Kararsızım	Kararsızım	Katılmıyorum	Katılmıyorum	Kararsızım	Katılıyorum	Katılıyorum	Kararsızım	Katılıyorum	Kararsızım	Katılıyorum	Katılıyorum	Kararsızım	Katılmıyorum	Katılmıyorum	Kararsızım	Kararsızım	Katılmıyorum	Kararsızım
2025-12-05 09:44:36	Evet	Kadın	20-21	3. Sınıf	Katılıyorum	Katılıyorum	Kararsızım	Katılıyorum	Katılıyorum	Katılıyorum	Kararsızım	Katılıyorum	Katılıyorum	Katılıyorum	Katılıyorum	Katılıyorum	Katılıyorum	Katılıyorum	Katılıyorum	Kararsızım	Kararsızım	Katılıyorum	Katılıyorum	Kararsızım	Katılıyorum	Kararsızım
2025-12-05 09:44:56	Evet	Kadın	20-21	3. Sınıf	Kararsızım	Kararsızım	Katılıyorum	Katılıyorum	Katılmıyorum	Katılmıyorum	Katılmıyorum	Katılmıyorum	Katılmıyorum	Kararsızım	Kararsızım	Katılmıyorum	Katılmıyorum	Kararsızım	Katılıyorum	Katılıyorum	Kararsızım	Katılmıyorum	Kararsızım	Kararsızım	Kararsızım	Kararsızım
2025-12-05 09:45:41	Evet	Kadın	20-21	3. Sınıf	Katılmıyorum	Katılmıyorum	Katılmıyorum	Katılmıyorum	Katılıyorum	Katılıyorum	Katılıyorum	Katılıyorum	Katılmıyorum	Katılmıyorum	Katılmıyorum	Katılmıyorum	Katılmıyorum	Katılıyorum	Katılmıyorum	Katılmıyorum	Katılmıyorum	Katılmıyorum	Katılmıyorum	Katılmıyorum	Katılmıyorum	Katılmıyorum
2025-12-05 09:49:22	Evet	Kadın	22-23	3. Sınıf	Katılıyorum	Katılıyorum	Kararsızım	Kararsızım	Katılmıyorum	Kararsızım	Kararsızım	Katılıyorum	Katılıyorum	Kararsızım	Katılıyorum	Katılıyorum	Kararsızım	Katılıyorum	Kararsızım	Kararsızım	Kararsızım	Kararsızım	Katılıyorum	Kararsızım	Katılıyorum	Kararsızım
2025-12-05 10:04:17	Evet	Kadın	20-21	3. Sınıf	Katılmıyorum	Katılmıyorum	Kesinlikle katılmıyorum	Katılmıyorum	Kesinlikle katılmıyorum	Kesinlikle katılmıyorum	Kesinlikle katılmıyorum	Katılmıyorum	Kesinlikle katılmıyorum	Katılmıyorum	Kesinlikle katılmıyorum	Kesinlikle katılmıyorum	Kesinlikle katılmıyorum	Kesinlikle katılmıyorum	Katılmıyorum	Kesinlikle katılmıyorum	Kesinlikle katılmıyorum	Katılmıyorum	Kesinlikle katılmıyorum	Kesinlikle katılmıyorum	Katılmıyorum	Kesinlikle katılmıyorum
2025-12-05 10:04:24	Evet	Kadın	20-21	3. Sınıf	Katılmıyorum	Katılmıyorum	Katılmıyorum	Katılmıyorum	Katılmıyorum	Kararsızım	Kararsızım	Kararsızım	Katılıyorum	Katılıyorum	Katılıyorum	Katılıyorum	Katılıyorum	Katılıyorum	Katılıyorum	Katılıyorum	Katılıyorum	Katılıyorum	Katılıyorum	Katılıyorum	Katılıyorum	Katılıyorum
2025-12-05 10:11:10	Evet	Erkek	25+	5. Sınıf	Kararsızım	Kararsızım	Kararsızım	Kararsızım	Kararsızım	Kararsızım	Kararsızım	Kararsızım	Kararsızım	Kararsızım	Kararsızım	Kararsızım	Kararsızım	Kararsızım	Kararsızım	Kararsızım	Kararsızım	Kararsızım	Kararsızım	Kararsızım	Kararsızım	Kararsızım
2025-12-05 10:14:01	Evet	Kadın	25+	4. Sınıf	Katılıyorum	Katılıyorum	Katılıyorum	Katılıyorum	Katılıyorum	Katılıyorum	Katılıyorum	Katılıyorum	Katılıyorum	Katılıyorum	Katılıyorum	Katılıyorum	Katılıyorum	Katılıyorum	Katılıyorum	Katılıyorum	Katılıyorum	Katılıyorum	Katılıyorum	Katılıyorum	Katılıyorum	Katılıyorum
2025-12-05 10:14:02	Evet	Erkek	22-23	4. Sınıf	Katılıyorum	Katılıyorum	Katılıyorum	Katılıyorum	Katılıyorum	Katılıyorum	Katılıyorum	Katılıyorum	Katılıyorum	Katılıyorum	Katılıyorum	Katılıyorum	Katılıyorum	Kesinlikle katılıyorum	Katılıyorum	Katılıyorum	Katılıyorum	Katılıyorum	Katılıyorum	Katılıyorum	Katılıyorum	Katılıyorum
2025-12-05 10:54:19	Evet	Kadın	22-23	5. Sınıf	Katılmıyorum	Katılmıyorum	Katılmıyorum	Katılmıyorum	Katılmıyorum	Katılıyorum	Katılıyorum	Katılıyorum	Katılıyorum	Katılıyorum	Katılıyorum	Katılıyorum	Katılıyorum	Katılıyorum	Katılıyorum	Katılıyorum	Katılıyorum	Katılıyorum	Katılıyorum	Katılıyorum	Katılıyorum	Katılıyorum
2025-12-05 11:12:35	Evet	Erkek	25+	6. Sınıf	Kararsızım	Kararsızım	Kararsızım	Katılıyorum	Katılıyorum	Katılıyorum	Katılıyorum	Katılıyorum	Katılıyorum	Katılıyorum	Katılıyorum	Katılıyorum	Katılıyorum	Kesinlikle katılıyorum	Katılıyorum	Katılıyorum	Katılıyorum	Katılıyorum	Katılıyorum	Katılıyorum	Katılıyorum	Katılıyorum
2025-12-05 11:13:24	Evet	Erkek	25+	6. Sınıf	Katılıyorum	Kararsızım	Katılıyorum	Katılıyorum	Katılıyorum	Katılıyorum	Kesinlikle katılıyorum	Kesinlikle katılıyorum	Kesinlikle katılıyorum	Kesinlikle katılıyorum	Katılıyorum	Katılıyorum	Katılıyorum	Kesinlikle katılıyorum	Katılıyorum	Katılıyorum	Kesinlikle katılıyorum	Kesinlikle katılıyorum	Kesinlikle katılıyorum	Kararsızım	Katılıyorum	Katılmıyorum
2025-12-05 11:15:29	Evet	Kadın	24-25	6. Sınıf	Katılıyorum	Kararsızım	Kararsızım	Kararsızım	Kararsızım	Kararsızım	Kararsızım	Kararsızım	Kararsızım	Kararsızım	Kararsızım	Kararsızım	Kararsızım	Kararsızım	Kararsızım	Kararsızım	Kararsızım	Kararsızım	Kararsızım	Kararsızım	Kararsızım	Kararsızım
2025-12-05 11:18:33	Evet	Erkek	24-25	6. Sınıf	Kesinlikle katılıyorum	Kesinlikle katılıyorum	Katılıyorum	Kesinlikle katılıyorum	Kesinlikle katılıyorum	Kesinlikle katılıyorum	Kesinlikle katılıyorum	Katılıyorum	Katılıyorum	Katılıyorum	Katılıyorum	Kesinlikle katılıyorum	Katılıyorum	Kararsızım	Katılmıyorum	Katılıyorum	Kesinlikle katılıyorum	Kesinlikle katılıyorum	Kesinlikle katılıyorum	Kararsızım	Kararsızım	Katılmıyorum
2025-12-05 11:25:59	Evet	Erkek	22-23	4. Sınıf	Katılıyorum	Katılıyorum	Kararsızım	Katılıyorum	Katılıyorum	Katılıyorum	Kararsızım	Kararsızım	Kesinlikle katılıyorum	Kesinlikle katılıyorum	Kesinlikle katılıyorum	Kararsızım	Katılıyorum	Kesinlikle katılıyorum	Katılıyorum	Katılıyorum	Kararsızım	Kesinlikle katılıyorum	Katılıyorum	Katılıyorum	Kararsızım	Kararsızım
2025-12-05 11:29:35	Evet	Erkek	22-23	5. Sınıf	Katılmıyorum	Katılmıyorum	Katılmıyorum	Katılmıyorum	Katılmıyorum	Kesinlikle katılmıyorum	Kesinlikle katılmıyorum	Katılmıyorum	Kesinlikle katılmıyorum	Katılmıyorum	Katılmıyorum	Kesinlikle katılmıyorum	Kesinlikle katılmıyorum	Katılmıyorum	Katılmıyorum	Katılmıyorum	Katılmıyorum	Katılmıyorum	Kesinlikle katılmıyorum	Katılmıyorum	Katılmıyorum	Katılmıyorum
2025-12-05 12:18:24	Evet	Kadın	22-23	5. Sınıf	Katılmıyorum	Katılmıyorum	Kararsızım	Kararsızım	Katılıyorum	Katılıyorum	Katılıyorum	Katılıyorum	Katılıyorum	Katılıyorum	Kesinlikle katılıyorum	Katılıyorum	Katılıyorum	Kesinlikle katılıyorum	Katılıyorum	Katılıyorum	Katılıyorum	Katılıyorum	Katılıyorum	Kesinlikle katılıyorum	Kesinlikle katılıyorum	Kesinlikle katılıyorum
2025-12-05 12:25:44	Evet	Erkek	18-19	2. Sınıf	Katılmıyorum	Katılmıyorum	Katılmıyorum	Katılmıyorum	Katılmıyorum	Kararsızım	Kararsızım	Katılıyorum	Kararsızım	Kararsızım	Kesinlikle katılıyorum	Katılıyorum	Katılmıyorum	Katılıyorum	Kararsızım	Kararsızım	Katılıyorum	Katılıyorum	Katılıyorum	Katılıyorum	Katılıyorum	Kararsızım
2025-12-05 12:26:04	Evet	Kadın	22-23	4. Sınıf	Katılmıyorum	Kesinlikle katılmıyorum	Kesinlikle katılmıyorum	Katılıyorum	Kararsızım	Kesinlikle katılıyorum	Katılıyorum	Katılıyorum	Katılıyorum	Kararsızım	Katılıyorum	Kararsızım	Kararsızım	Kesinlikle katılıyorum	Kesinlikle katılıyorum	Kesinlikle katılıyorum	Kararsızım	Kararsızım	Katılmıyorum	Kesinlikle katılıyorum	Kesinlikle katılıyorum	Kesinlikle katılmıyorum
2025-12-05 12:27:43	Evet	Erkek	24-25	5. Sınıf	Kararsızım	Kararsızım	Kararsızım	Katılıyorum	Kesinlikle katılıyorum	Katılıyorum	Kesinlikle katılıyorum	Kesinlikle katılıyorum	Kesinlikle katılıyorum	Kesinlikle katılıyorum	Kesinlikle katılıyorum	Kesinlikle katılıyorum	Kesinlikle katılıyorum	Kesinlikle katılıyorum	Kesinlikle katılmıyorum	Kesinlikle katılıyorum	Katılıyorum	Kararsızım	Kesinlikle katılmıyorum	Kesinlikle katılıyorum	Kesinlikle katılıyorum	Katılıyorum
2025-12-05 12:28:24	Evet	Erkek	24-25	5. Sınıf	Katılıyorum	Katılıyorum	Katılıyorum	Katılıyorum	Katılıyorum	Katılıyorum	Katılıyorum	Katılıyorum	Kesinlikle katılıyorum	Kesinlikle katılıyorum	Kesinlikle katılıyorum	Kesinlikle katılıyorum	Kesinlikle katılıyorum	Kesinlikle katılıyorum	Kararsızım	Katılıyorum	Katılıyorum	Katılıyorum	Kesinlikle katılıyorum	Kesinlikle katılıyorum	Kesinlikle katılıyorum	Kararsızım
2025-12-05 12:29:28	Evet	Kadın	20-21	2. Sınıf	Kesinlikle katılmıyorum	Katılmıyorum	Kesinlikle katılmıyorum	Kesinlikle katılmıyorum	Katılmıyorum	Katılıyorum	Katılıyorum	Katılıyorum	Katılıyorum	Katılıyorum	Katılıyorum	Katılıyorum	Katılıyorum	Katılıyorum	Katılıyorum	Katılıyorum	Kesinlikle katılmıyorum	Kararsızım	Kararsızım	Kararsızım	Kararsızım	Katılıyorum
2025-12-05 12:29:40	Evet	Kadın	20-21	3. Sınıf	Katılmıyorum	Katılmıyorum	Katılmıyorum	Katılmıyorum	Katılmıyorum	Katılmıyorum	Katılmıyorum	Katılmıyorum	Kesinlikle katılmıyorum	Katılmıyorum	Katılmıyorum	Kesinlikle katılmıyorum	Katılmıyorum	Katılmıyorum	Kesinlikle katılmıyorum	Katılmıyorum	Katılmıyorum	Katılmıyorum	Kesinlikle katılmıyorum	Katılmıyorum	Katılmıyorum	Katılmıyorum
2025-12-05 12:37:29	Evet	Erkek	18-19	2. Sınıf	Kararsızım	Kararsızım	Kararsızım	Kararsızım	Katılıyorum	Katılıyorum	Katılıyorum	Katılıyorum	Katılıyorum	Katılıyorum	Katılıyorum	Katılıyorum	Katılıyorum	Kararsızım	Katılıyorum	Katılıyorum	Kararsızım	Katılıyorum	Katılıyorum	Katılıyorum	Kesinlikle katılıyorum	Kararsızım
2025-12-05 12:38:03	Evet	Erkek	20-21	3. Sınıf	Kararsızım	Katılıyorum	Katılmıyorum	Katılmıyorum	Katılmıyorum	Kararsızım	Kararsızım	Katılıyorum	Katılıyorum	Katılıyorum	Katılıyorum	Katılıyorum	Katılıyorum	Katılıyorum	Katılmıyorum	Kararsızım	Katılıyorum	Katılıyorum	Katılıyorum	Kararsızım	Katılıyorum	Kararsızım
2025-12-05 12:46:33	Evet	Erkek	20-21	3. Sınıf	Kararsızım	Kararsızım	Kararsızım	Kararsızım	Kararsızım	Kararsızım	Kararsızım	Kararsızım	Katılıyorum	Katılıyorum	Kesinlikle katılıyorum	Katılıyorum	Katılıyorum	Kesinlikle katılıyorum	Katılıyorum	Katılıyorum	Katılıyorum	Katılıyorum	Katılıyorum	Katılıyorum	Kesinlikle katılıyorum	Kesinlikle katılıyorum
2025-12-05 13:02:27	Evet	Erkek	18-19	1. Sınıf	Katılıyorum	Katılıyorum	Katılıyorum	Katılıyorum	Katılıyorum	Katılıyorum	Katılıyorum	Katılıyorum	Katılıyorum	Katılıyorum	Katılıyorum	Katılıyorum	Katılıyorum	Katılıyorum	Katılıyorum	Katılıyorum	Katılıyorum	Katılıyorum	Katılıyorum	Katılıyorum	Katılıyorum	Katılıyorum
2025-12-05 14:16:18	Evet	Erkek	18-19	1. Sınıf	Kesinlikle katılıyorum	Katılıyorum	Kesinlikle katılmıyorum	Katılıyorum	Kesinlikle katılıyorum	Kesinlikle katılıyorum	Kesinlikle katılıyorum	Kesinlikle katılıyorum	Kesinlikle katılıyorum	Kesinlikle katılıyorum	Kesinlikle katılıyorum	Kesinlikle katılıyorum	Kararsızım	Kesinlikle katılıyorum	Katılıyorum	Kesinlikle katılıyorum	Katılmıyorum	Katılıyorum	Katılıyorum	Kesinlikle katılıyorum	Kesinlikle katılıyorum	Kesinlikle katılıyorum
2025-12-05 15:40:39	Evet	Kadın	20-21	3. Sınıf	Katılıyorum	Kararsızım	Kararsızım	Kararsızım	Katılıyorum	Katılıyorum	Katılıyorum	Katılıyorum	Katılıyorum	Katılıyorum	Katılıyorum	Katılıyorum	Katılıyorum	Katılıyorum	Katılıyorum	Katılıyorum	Katılıyorum	Katılıyorum	Katılıyorum	Katılıyorum	Katılıyorum	Katılıyorum
2025-12-05 17:32:03	Evet	Erkek	22-23	2. Sınıf	Kesinlikle katılıyorum	Kesinlikle katılıyorum	Kesinlikle katılıyorum	Kesinlikle katılıyorum	Kesinlikle katılıyorum	Kesinlikle katılıyorum	Kesinlikle katılıyorum	Kesinlikle katılıyorum	Kesinlikle katılıyorum	Kesinlikle katılıyorum	Kesinlikle katılıyorum	Kesinlikle katılıyorum	Kesinlikle katılıyorum	Kesinlikle katılıyorum	Kesinlikle katılıyorum	Kesinlikle katılıyorum	Kesinlikle katılıyorum	Kesinlikle katılıyorum	Kesinlikle katılıyorum	Kesinlikle katılıyorum	Kesinlikle katılıyorum	Kesinlikle katılıyorum
2025-12-05 17:39:35	Evet	Erkek	20-21	2. Sınıf	Katılıyorum	Katılıyorum	Katılıyorum	Katılıyorum	Katılıyorum	Katılıyorum	Katılıyorum	Katılıyorum	Katılıyorum	Katılıyorum	Katılıyorum	Katılıyorum	Katılıyorum	Katılıyorum	Katılıyorum	Katılıyorum	Katılıyorum	Katılıyorum	Katılıyorum	Kesinlikle katılıyorum	Kesinlikle katılıyorum	Katılıyorum
2025-12-05 17:45:44	Evet	Erkek	22-23	4. Sınıf	Katılıyorum	Katılıyorum	Katılıyorum	Katılıyorum	Katılıyorum	Katılıyorum	Katılıyorum	Katılıyorum	Katılıyorum	Katılıyorum	Katılıyorum	Katılıyorum	Katılıyorum	Katılıyorum	Katılıyorum	Katılıyorum	Katılıyorum	Katılıyorum	Katılıyorum	Katılıyorum	Katılıyorum	Katılıyorum
2025-12-05 17:49:31	Evet	Kadın	18-19	2. Sınıf	Kararsızım	Kararsızım	Kararsızım	Kararsızım	Kararsızım	Katılıyorum	Katılıyorum	Katılıyorum	Katılıyorum	Katılıyorum	Katılıyorum	Katılıyorum	Katılıyorum	Katılıyorum	Kararsızım	Katılıyorum	Katılıyorum	Katılıyorum	Katılıyorum	Katılıyorum	Katılıyorum	Kararsızım
2025-12-05 17:50:31	Evet	Erkek	22-23	2. Sınıf	Kesinlikle katılıyorum	Kesinlikle katılıyorum	Kesinlikle katılıyorum	Kesinlikle katılıyorum	Kesinlikle katılıyorum	Kesinlikle katılıyorum	Kesinlikle katılıyorum	Kesinlikle katılıyorum	Kesinlikle katılıyorum	Kesinlikle katılıyorum	Kesinlikle katılıyorum	Kesinlikle katılıyorum	Kesinlikle katılıyorum	Kesinlikle katılıyorum	Kesinlikle katılıyorum	Kesinlikle katılıyorum	Kesinlikle katılıyorum	Kesinlikle katılıyorum	Kesinlikle katılıyorum	Kesinlikle katılıyorum	Kesinlikle katılıyorum	Kesinlikle katılıyorum
2025-12-05 17:51:07	Evet	Kadın	18-19	2. Sınıf	Katılmıyorum	Katılmıyorum	Katılmıyorum	Katılmıyorum	Katılmıyorum	Katılmıyorum	Katılmıyorum	Katılmıyorum	Katılmıyorum	Katılmıyorum	Katılmıyorum	Katılıyorum	Katılmıyorum	Katılmıyorum	Katılmıyorum	Katılmıyorum	Katılmıyorum	Katılmıyorum	Katılmıyorum	Katılmıyorum	Katılmıyorum	Katılmıyorum
2025-12-05 17:52:26	Evet	Erkek	20-21	1. Sınıf	Katılmıyorum	Katılmıyorum	Katılmıyorum	Katılmıyorum	Kesinlikle katılmıyorum	Katılmıyorum	Katılmıyorum	Katılmıyorum	Katılmıyorum	Kesinlikle katılmıyorum	Katılmıyorum	Katılmıyorum	Kesinlikle katılmıyorum	Katılmıyorum	Kesinlikle katılmıyorum	Kesinlikle katılmıyorum	Katılmıyorum	Katılmıyorum	Katılmıyorum	Katılmıyorum	Kesinlikle katılmıyorum	Kesinlikle katılmıyorum
2025-12-05 19:33:06	Evet	Erkek	18 altı	1. Sınıf	Kararsızım	Katılıyorum	Kararsızım	Kararsızım	Kararsızım	Katılıyorum	Kararsızım	Katılıyorum	Katılıyorum	Kesinlikle katılıyorum	Kesinlikle katılıyorum	Katılıyorum	Katılıyorum	Kesinlikle katılıyorum	Katılıyorum	Katılıyorum	Katılıyorum	Katılıyorum	Katılıyorum	Kesinlikle katılıyorum	Kesinlikle katılıyorum	Katılıyorum
2025-12-05 19:37:38	Evet	Erkek	18-19	2. Sınıf	Katılmıyorum	Katılmıyorum	Katılmıyorum	Katılmıyorum	Katılmıyorum	Kararsızım	Katılıyorum	Katılıyorum	Katılıyorum	Katılıyorum	Katılıyorum	Katılıyorum	Kararsızım	Kesinlikle katılıyorum	Katılıyorum	Kararsızım	Kararsızım	Kararsızım	Kararsızım	Katılıyorum	Katılıyorum	Katılmıyorum
2025-12-05 23:13:30	Evet	Erkek	20-21	2. Sınıf	Kararsızım	Kararsızım	Katılıyorum	Katılıyorum	Katılıyorum	Katılıyorum	Katılıyorum	Katılıyorum	Kesinlikle katılıyorum	Kesinlikle katılıyorum	Kesinlikle katılıyorum	Katılıyorum	Katılıyorum	Kesinlikle katılıyorum	Kararsızım	Kararsızım	Katılıyorum	Katılıyorum	Katılıyorum	Katılıyorum	Katılıyorum	Katılmıyorum
2025-12-06 12:28:10	Evet	Kadın	20-21	2. Sınıf	Kesinlikle katılıyorum	Kesinlikle katılıyorum	Kesinlikle katılıyorum	Kesinlikle katılıyorum	Kesinlikle katılıyorum	Kesinlikle katılıyorum	Kesinlikle katılıyorum	Kesinlikle katılıyorum	Kesinlikle katılıyorum	Kesinlikle katılıyorum	Kesinlikle katılıyorum	Kesinlikle katılıyorum	Kesinlikle katılıyorum	Kesinlikle katılıyorum	Kesinlikle katılıyorum	Kesinlikle katılıyorum	Kesinlikle katılıyorum	Kesinlikle katılıyorum	Kesinlikle katılıyorum	Katılıyorum	Kesinlikle katılıyorum	Katılıyorum
2025-12-07 01:20:20	Evet	Kadın	22-23	6. Sınıf	Katılıyorum	Katılıyorum	Katılmıyorum	Kararsızım	Katılıyorum	Katılıyorum	Katılıyorum	Kararsızım	Katılıyorum	Kararsızım	Katılıyorum	Katılıyorum	Katılıyorum	Katılıyorum	Katılıyorum	Katılıyorum	Kararsızım	Kararsızım	Kararsızım	Kararsızım	Katılmıyorum	Kesinlikle katılmıyorum
2025-12-07 13:15:32	Evet	Kadın	20-21	3. Sınıf	Katılıyorum	Katılıyorum	Kararsızım	Kararsızım	Kararsızım	Kararsızım	Kararsızım	Kararsızım	Kararsızım	Kararsızım	Kararsızım	Katılıyorum	Kararsızım	Kararsızım	Kararsızım	Kararsızım	Kararsızım	Kararsızım	Kararsızım	Katılıyorum	Kararsızım	Kararsızım
2025-12-07 16:45:37	Evet	Kadın	22-23	4. Sınıf	Katılmıyorum	Katılmıyorum	Katılmıyorum	Katılmıyorum	Katılmıyorum	Katılmıyorum	Katılmıyorum	Katılmıyorum	Katılıyorum	Katılmıyorum	Katılıyorum	Katılıyorum	Kararsızım	Kararsızım	Katılıyorum	Kararsızım	Kesinlikle katılmıyorum	Katılıyorum	Katılıyorum	Katılmıyorum	Katılmıyorum	Kararsızım
2025-12-12 09:48:19	Evet	Kadın	20-21	4. Sınıf	Kararsızım	Kararsızım	Kararsızım	Kararsızım	Kararsızım	Kararsızım	Kararsızım	Kararsızım	Kararsızım	Kararsızım	Kararsızım	Kararsızım	Kararsızım	Kararsızım	Kararsızım	Kararsızım	Kararsızım	Kararsızım	Kararsızım	Kararsızım	Kararsızım	Kararsızım
2025-12-12 09:48:57	Evet	Kadın	22-23	4. Sınıf	Kararsızım	Kararsızım	Katılmıyorum	Katılmıyorum	Katılmıyorum	Katılmıyorum	Katılmıyorum	Kararsızım	Kararsızım	Kararsızım	Kararsızım	Katılıyorum	Kararsızım	Katılıyorum	Kararsızım	Kararsızım	Kararsızım	Kararsızım	Kararsızım	Kararsızım	Kararsızım	Kararsızım
2025-12-12 09:50:28	Evet	Erkek	22-23	5. Sınıf	Kararsızım	Katılıyorum	Kesinlikle katılmıyorum	Kesinlikle katılmıyorum	Katılıyorum	Katılıyorum	Katılıyorum	Kesinlikle katılmıyorum	Katılıyorum	Katılıyorum	Katılıyorum	Katılıyorum	Katılıyorum	Katılıyorum	Kesinlikle katılmıyorum	Kesinlikle katılıyorum	Katılıyorum	Kararsızım	Kararsızım	Katılıyorum	Katılıyorum	Katılmıyorum
2025-12-12 09:50:42	Evet	Kadın	22-23	4. Sınıf	Katılıyorum	Kararsızım	Katılmıyorum	Katılmıyorum	Katılıyorum	Katılıyorum	Katılıyorum	Katılıyorum	Katılıyorum	Katılıyorum	Katılıyorum	Katılıyorum	Katılıyorum	Katılıyorum	Katılıyorum	Katılıyorum	Katılıyorum	Katılıyorum	Katılıyorum	Katılıyorum	Katılıyorum	Katılıyorum
2025-12-12 09:51:20	Evet	Kadın	20-21	4. Sınıf	Katılıyorum	Kararsızım	Kararsızım	Kararsızım	Kararsızım	Kararsızım	Katılıyorum	Kararsızım	Katılıyorum	Katılıyorum	Katılıyorum	Katılıyorum	Katılıyorum	Katılıyorum	Katılıyorum	Katılıyorum	Katılıyorum	Katılıyorum	Katılıyorum	Katılıyorum	Katılıyorum	Kararsızım
2025-12-12 09:52:13	Evet	Kadın	24-25	6. Sınıf	Katılmıyorum	Katılıyorum	Katılmıyorum	Katılmıyorum	Kararsızım	Katılmıyorum	Katılmıyorum	Katılmıyorum	Katılıyorum	Kararsızım	Kararsızım	Kararsızım	Katılmıyorum	Kararsızım	Katılmıyorum	Katılıyorum	Katılıyorum	Katılmıyorum	Katılıyorum	Katılmıyorum	Katılmıyorum	Katılmıyorum
2025-12-12 10:31:26	Evet	Erkek	22-23	3. Sınıf	Kararsızım	Katılıyorum	Katılmıyorum	Katılıyorum	Katılmıyorum	Katılmıyorum	Katılmıyorum	Katılmıyorum	Katılmıyorum	Kararsızım	Kararsızım	Katılmıyorum	Kararsızım	Katılmıyorum	Kararsızım	Katılmıyorum	Katılmıyorum	Katılmıyorum	Katılmıyorum	Kararsızım	Katılıyorum	Katılıyorum
2025-12-12 10:33:10	Evet	Kadın	20-21	3. Sınıf	Katılmıyorum	Katılmıyorum	Katılmıyorum	Katılmıyorum	Katılmıyorum	Kesinlikle katılmıyorum	Kesinlikle katılmıyorum	Katılmıyorum	Kesinlikle katılmıyorum	Kesinlikle katılmıyorum	Kesinlikle katılmıyorum	Kesinlikle katılmıyorum	Kesinlikle katılmıyorum	Kesinlikle katılmıyorum	Katılmıyorum	Katılmıyorum	Kesinlikle katılmıyorum	Kesinlikle katılmıyorum	Kesinlikle katılmıyorum	Kesinlikle katılmıyorum	Kesinlikle katılmıyorum	Kesinlikle katılmıyorum
2025-12-12 11:41:12	Evet	Erkek	24-25	6. Sınıf	Kararsızım	Katılmıyorum	Katılmıyorum	Katılmıyorum	Katılıyorum	Katılıyorum	Katılıyorum	Katılıyorum	Katılıyorum	Kesinlikle katılıyorum	Kesinlikle katılıyorum	Katılıyorum	Katılıyorum	Kesinlikle katılıyorum	Kararsızım	Kesinlikle katılıyorum	Katılmıyorum	Katılıyorum	Katılıyorum	Katılıyorum	Katılıyorum	Katılıyorum
2025-12-12 13:24:57	Evet	Erkek	22-23	4. Sınıf	Katılıyorum	Katılıyorum	Katılıyorum	Katılıyorum	Katılıyorum	Katılıyorum	Katılıyorum	Katılıyorum	Katılıyorum	Katılıyorum	Katılıyorum	Katılıyorum	Katılıyorum	Katılıyorum	Katılıyorum	Katılıyorum	Katılıyorum	Katılıyorum	Katılıyorum	Katılıyorum	Katılıyorum	Katılıyorum
2025-12-12 14:14:25	Evet	Erkek	22-23	5. Sınıf	Katılıyorum	Katılıyorum	Katılıyorum	Kararsızım	Katılıyorum	Katılıyorum	Katılıyorum	Katılmıyorum	Katılıyorum	Katılıyorum	Katılıyorum	Katılıyorum	Katılmıyorum	Katılmıyorum	Katılmıyorum	Kararsızım	Katılmıyorum	Kesinlikle katılmıyorum	Kesinlikle katılmıyorum	Katılıyorum	Katılıyorum	Katılıyorum
